# Supplementary material for: Organocatalytic C3-functionalization of indolizines: synthesis of biologically important indolizine derivatives
Source: Royal Society of Chemistry journal article supplement (doi:10.1039/d0ob01230k), 2020-01-01
Supplement: d0ob01230k1.pdf [file d0ob01230k1.pdf]

## *Supporting Information for*

### **Organocatalytic C3-Functionalization of Indolizines: Synthesis of Biologically Important Indolizine Derivatives**

Yi-Zhu Zhang<sup>a,‡</sup>, Feng-Tao Sheng<sup>a,‡</sup>, Zuoquan Zhu<sup>b,‡</sup>, Zhi-Ming Li<sup>a</sup>, Shu Zhang<sup>b,\*</sup>,  
Wei Tan<sup>a,\*</sup> and Feng Shi<sup>a,\*</sup>

<sup>a</sup>*School of Chemistry and Materials Science, Jiangsu Normal University, Xuzhou, 221116, P. R. China*

<sup>b</sup>*Department of Radiation Oncology and the Department of Radiotherapy, the First Affiliated Hospital of Nanjing Medical University, Nanjing, P. R. China*

<sup>‡</sup>*These authors contributed equally to this work.*

*E-mail: fshi@jsnu.edu.cn; wtan@jsnu.edu.cn; zhangshu@njmu.edu.cn*

#### **Contents:**

- 1. NMR spectra of products 3, 5, 7, 9, 11 and 13 (S2-S21)**
- 2. X-ray single crystal data for compound 5 (S22-S23)**
- 3. HPLC copies of 3aa (S24)**

# 1. NMR spectra of products 3, 5, 7, 9, 11 and 13

## <sup>1</sup>H NMR (400 MHz, CDCl<sub>3</sub>) of compound 3aa

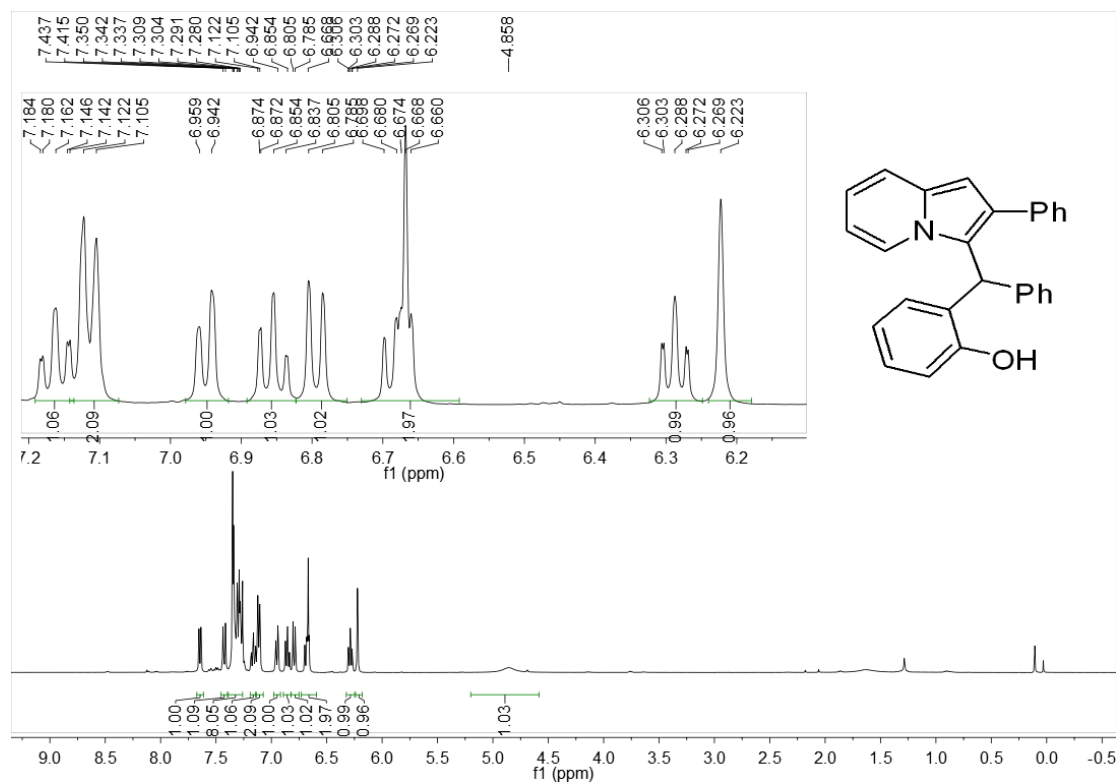

## <sup>13</sup>C NMR (100 MHz, CDCl<sub>3</sub>) of compound 3aa

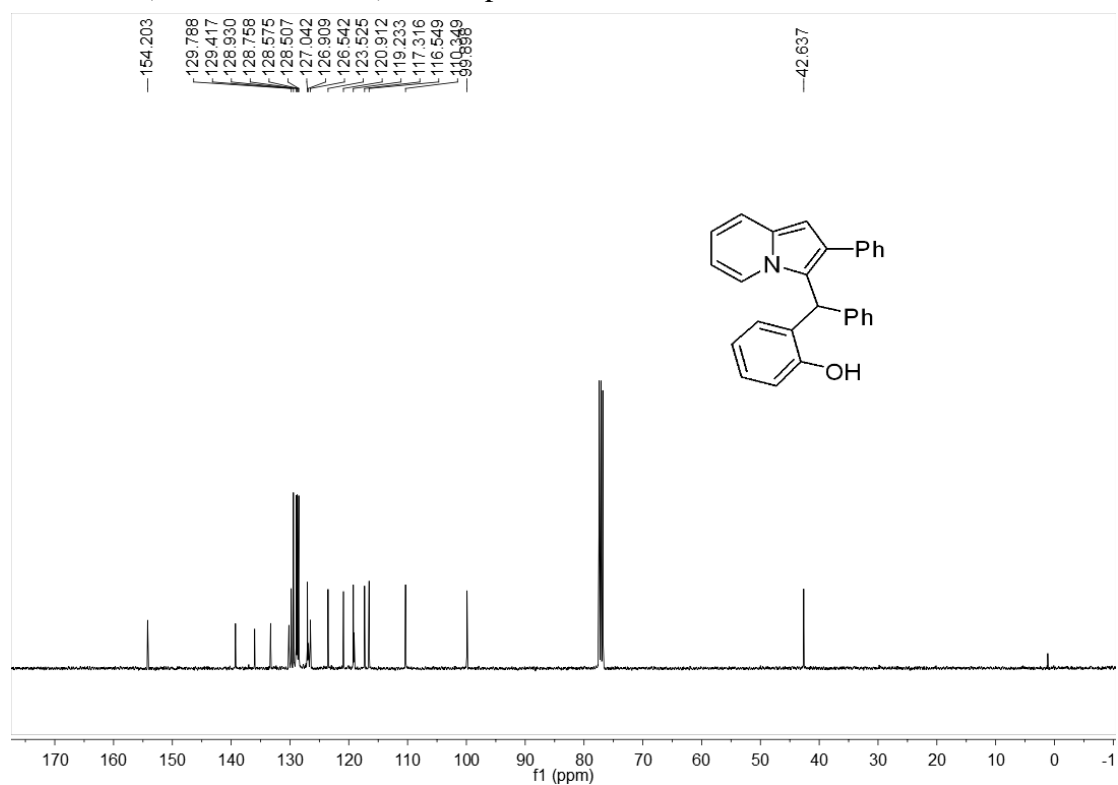

$^1\text{H}$  NMR (400 MHz,  $\text{CDCl}_3$ ) of compound **3ba**

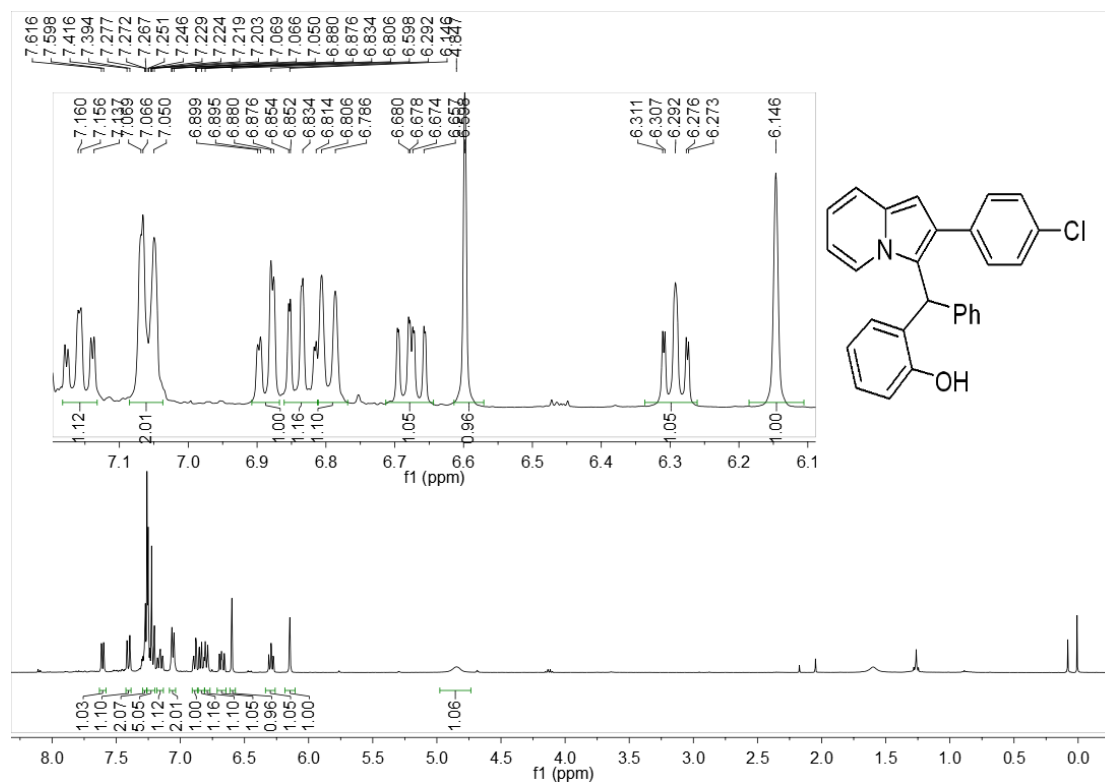

$^{13}\text{C}$  NMR (100 MHz,  $\text{CDCl}_3$ ) of compound **3ba**

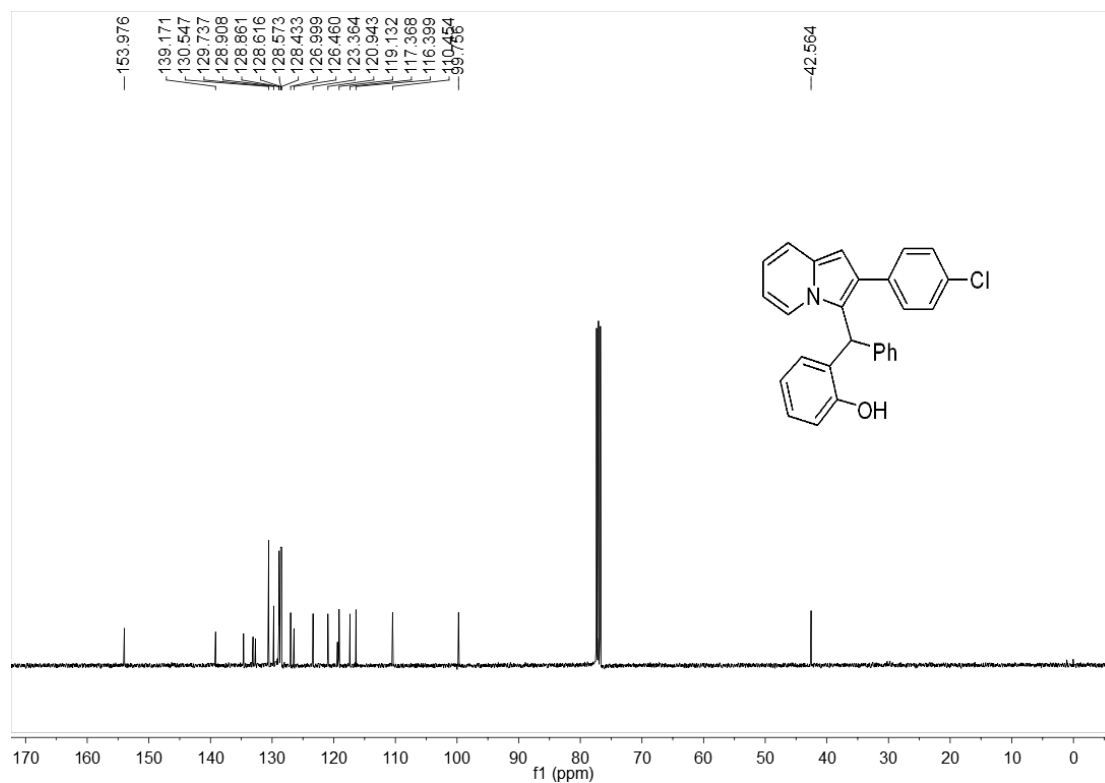

$^1\text{H}$  NMR (400 MHz, *acetone-d*<sub>6</sub>) of compound **3ca**

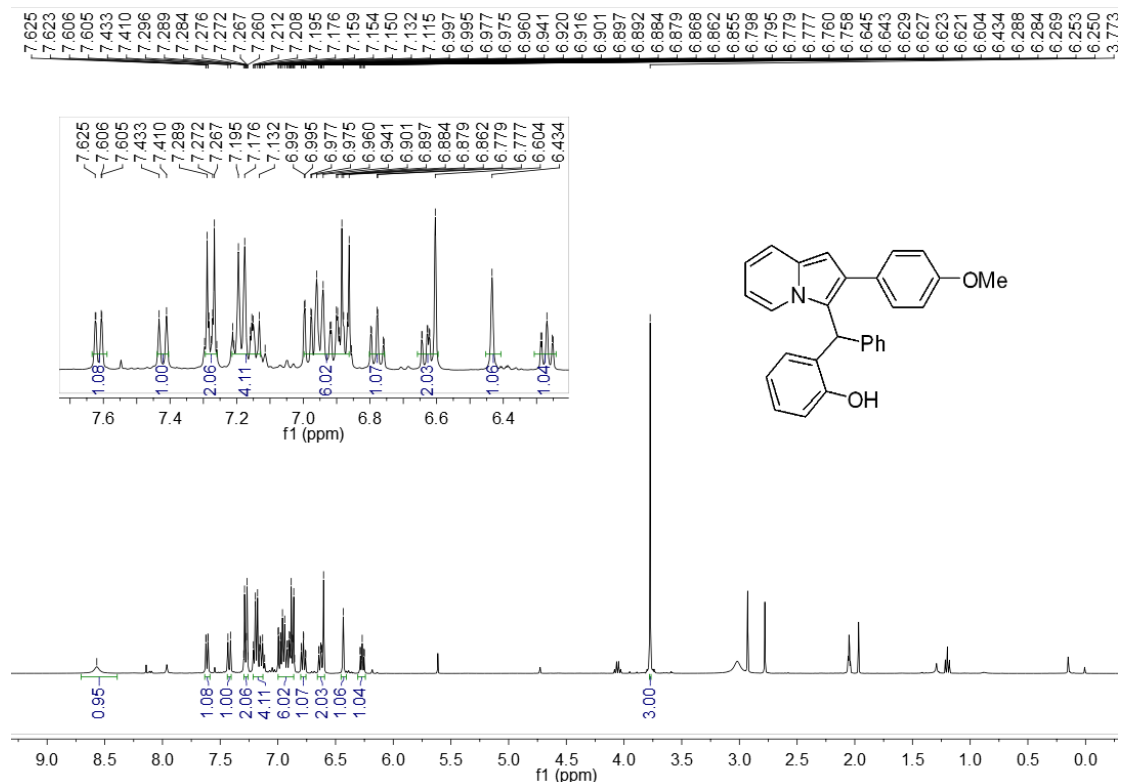

$^{13}\text{C}$  NMR (100 MHz,  $\text{CDCl}_3$ ) of compound **3ca**

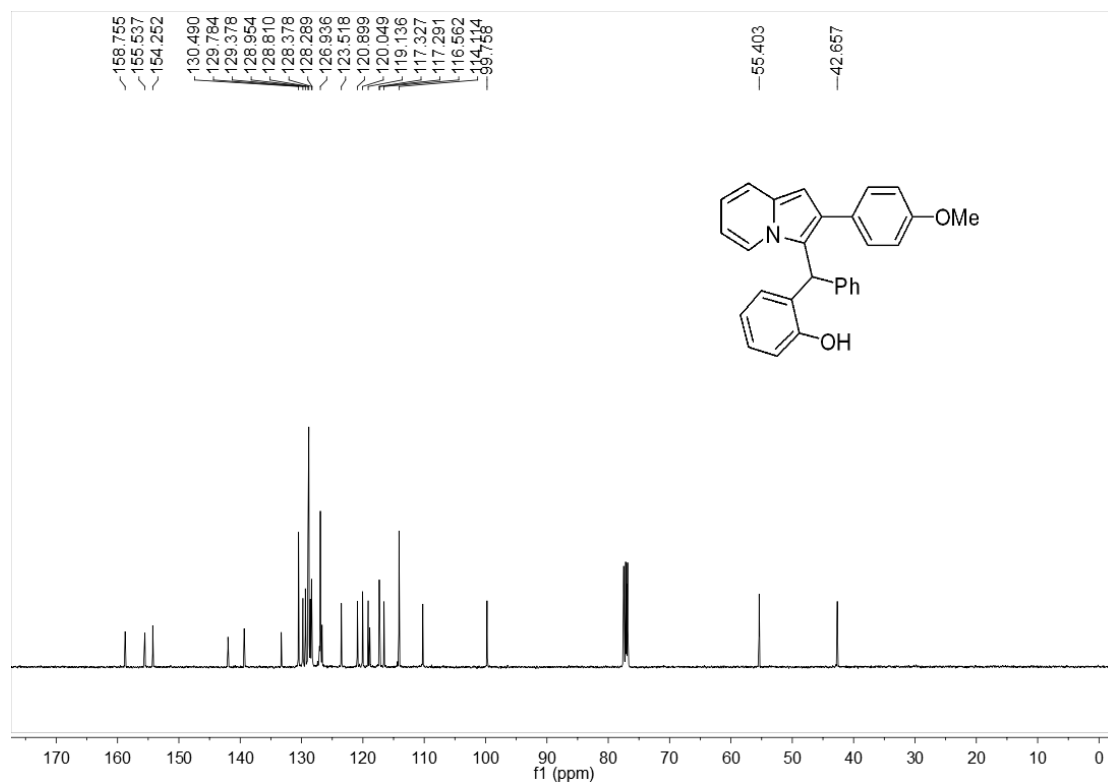

<sup>1</sup>H NMR (400 MHz, CDCl<sub>3</sub>) of compound **3da**

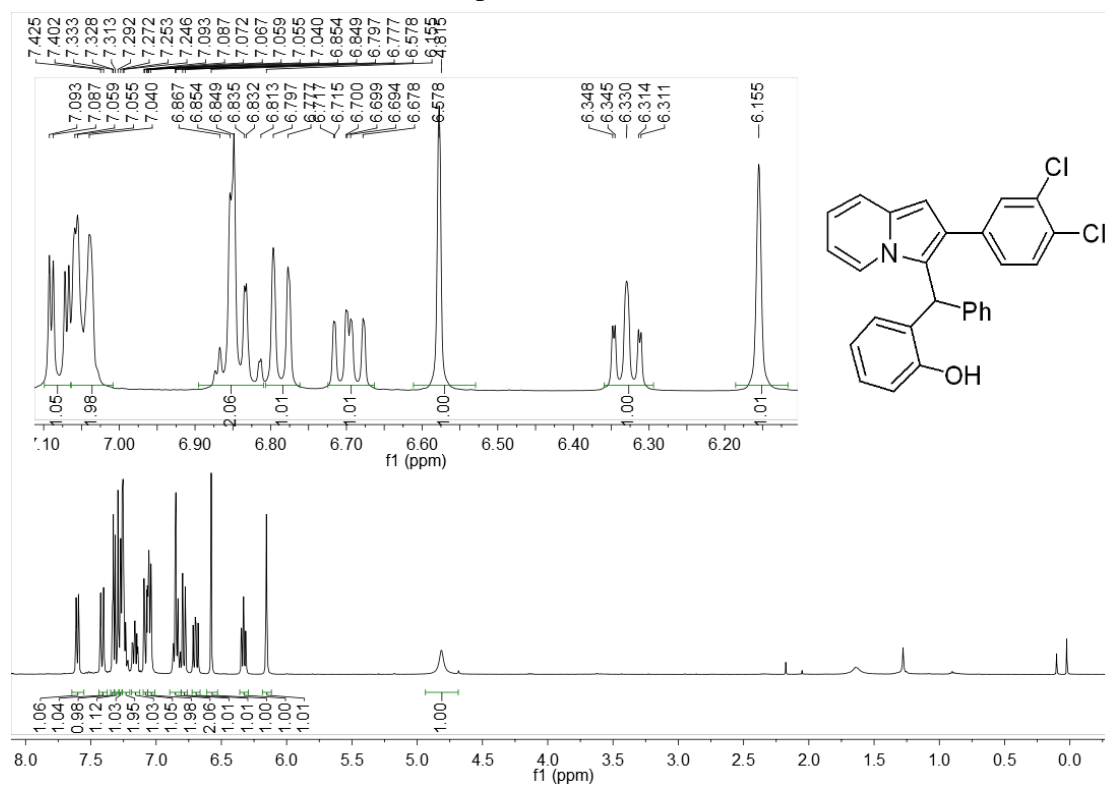

<sup>13</sup>C NMR (100 MHz, CDCl<sub>3</sub>) of compound **3da**

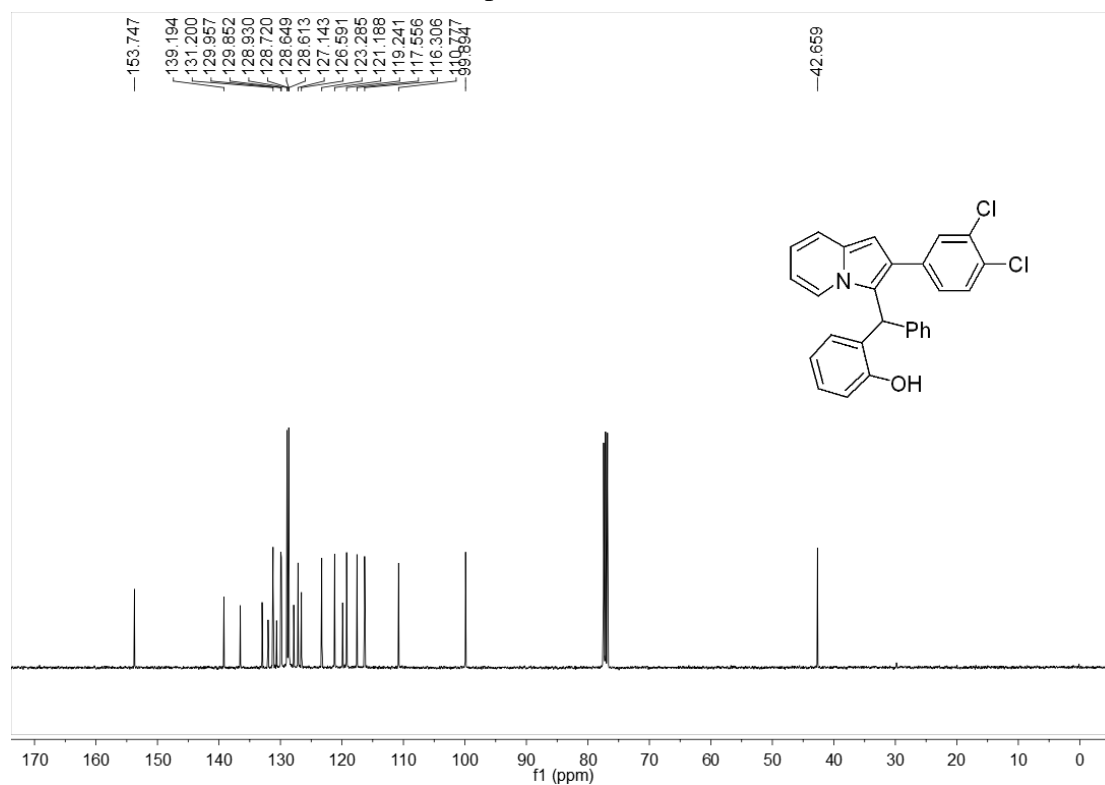

$^1\text{H}$  NMR (400 MHz, *acetone-d*<sub>6</sub>) of compound **3ea**

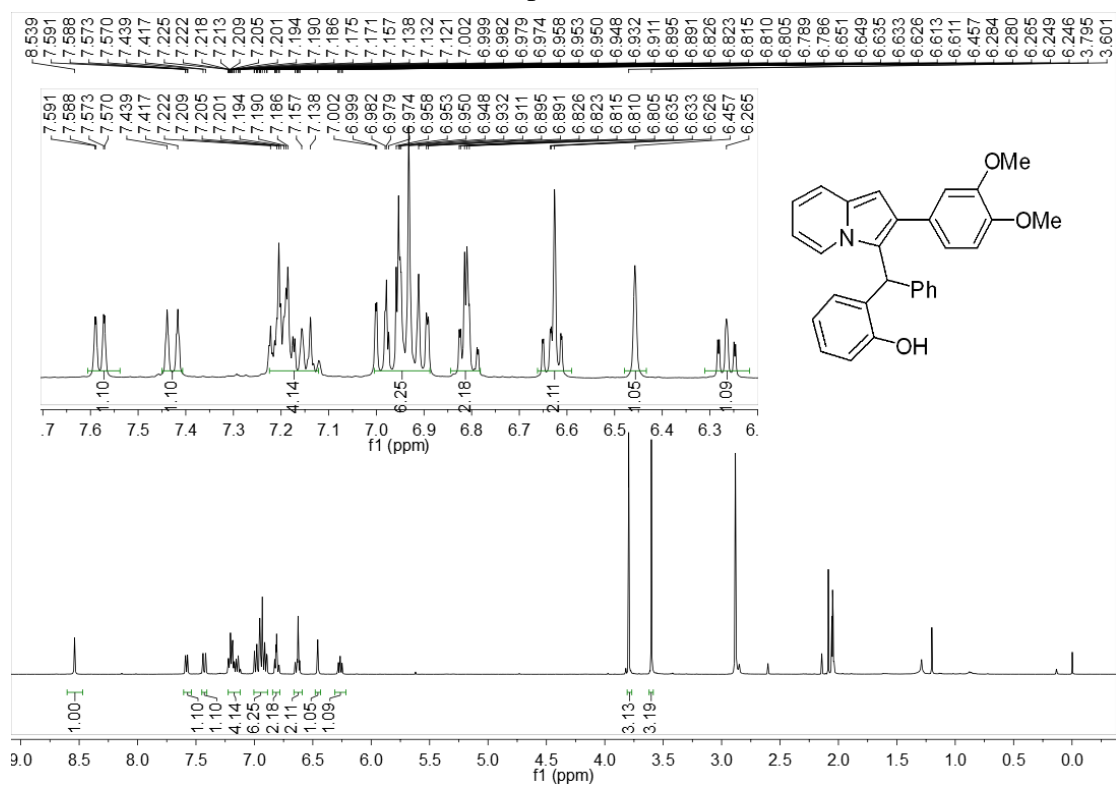

$^{13}\text{C}$  NMR (100 MHz,  $\text{CDCl}_3$ ) of compound **3ea**

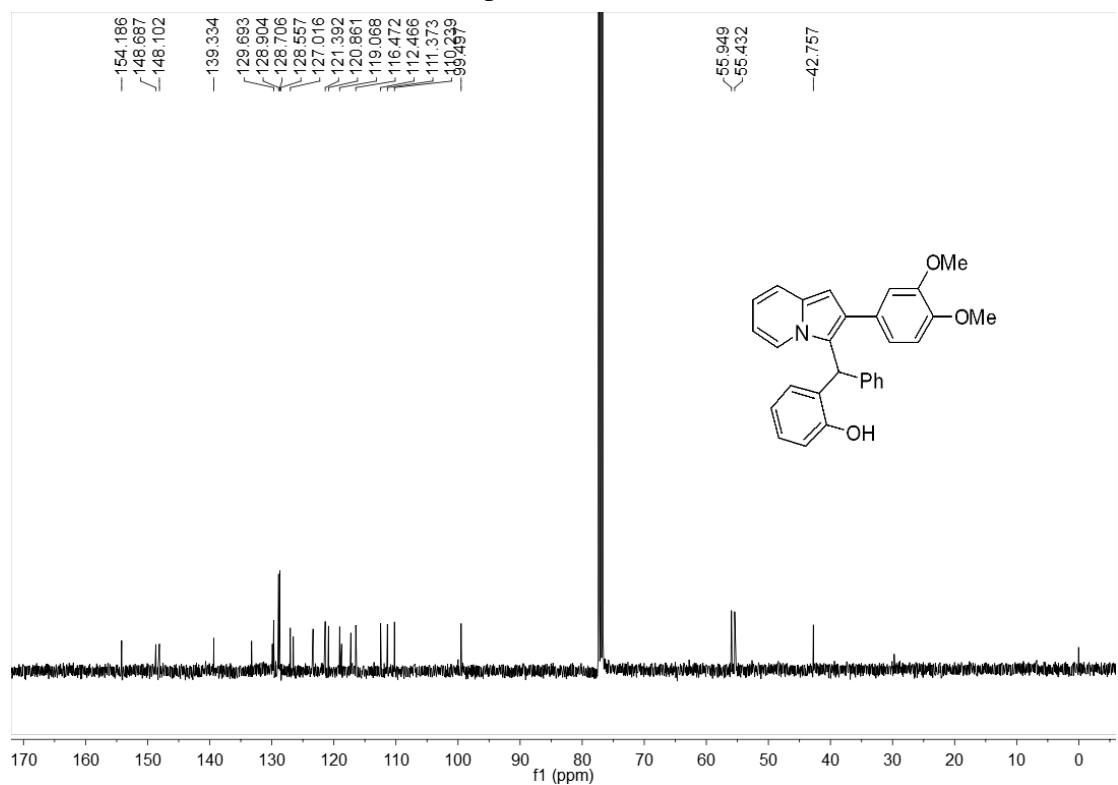

$^1\text{H}$  NMR (400 MHz, *acetone-d*<sub>6</sub>) of compound **3fa**

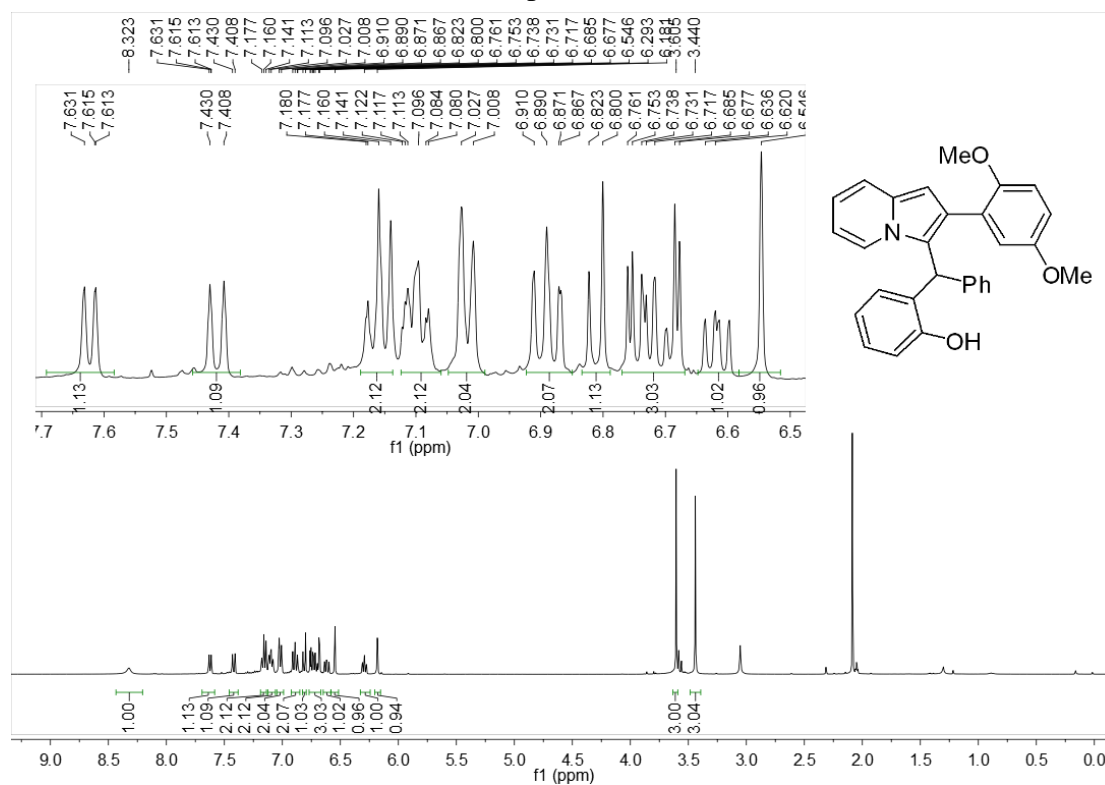

$^{13}\text{C}$  NMR (100 MHz,  $\text{CDCl}_3$ ) of compound **3fa**

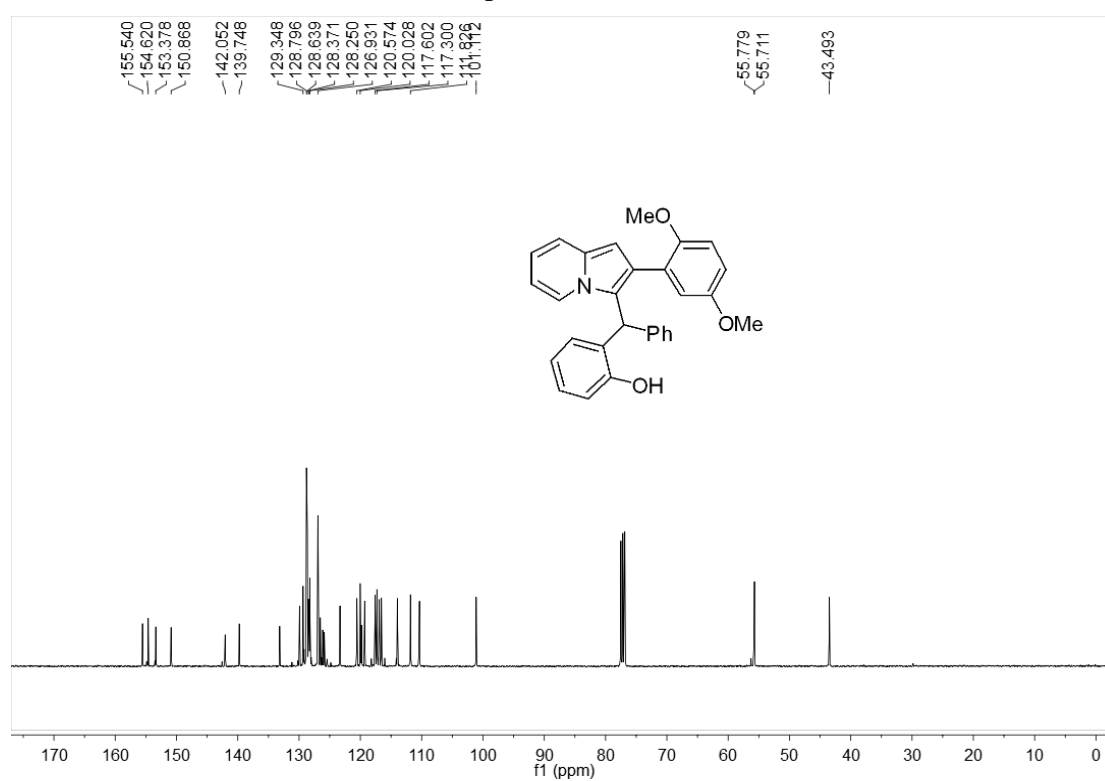

$^1\text{H}$  NMR (400 MHz, *acetone-d*<sub>6</sub>) of compound **3ga**

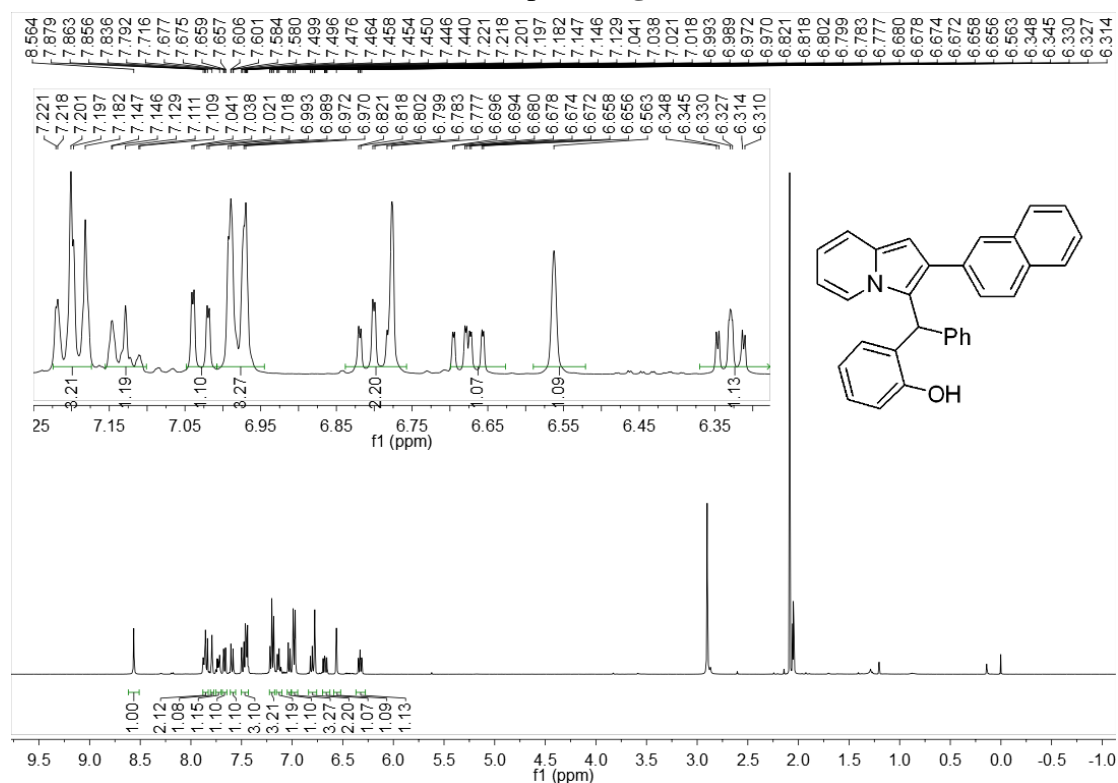

$^{13}\text{C}$  NMR (100 MHz,  $\text{CDCl}_3$ ) of compound **3ga**

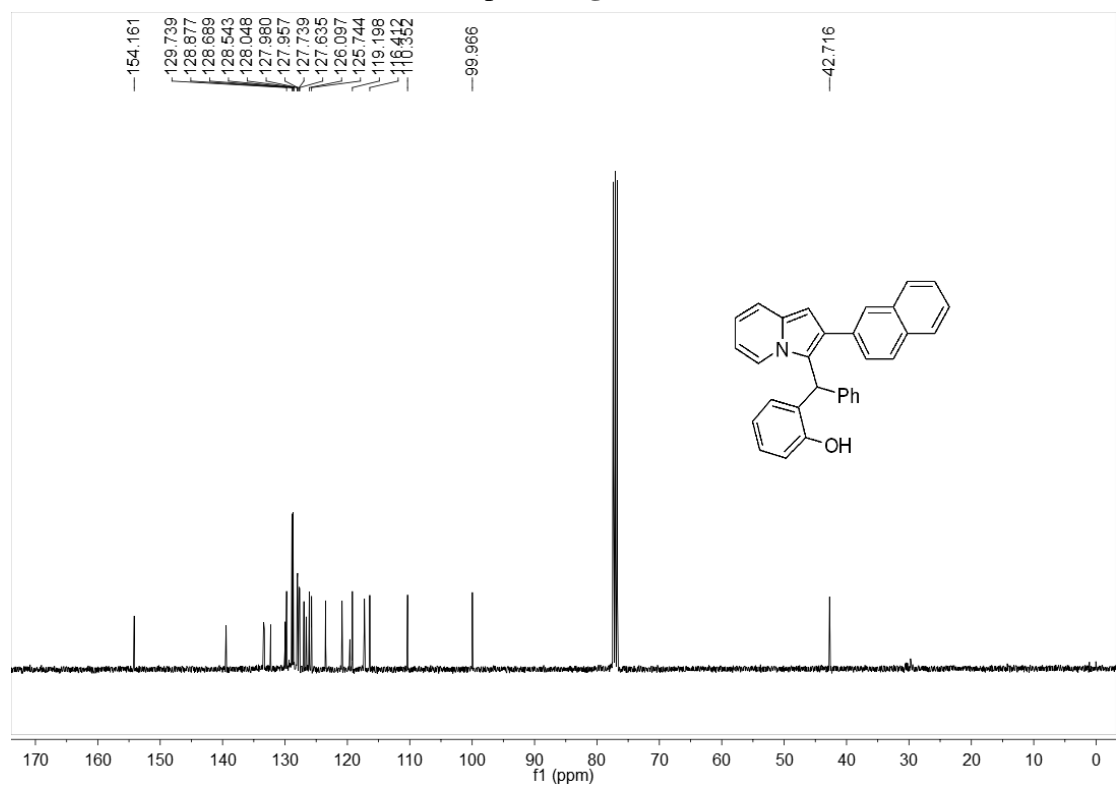



$^1\text{H}$  NMR (400 MHz, *acetone-d*<sub>6</sub>) of compound **3ha**

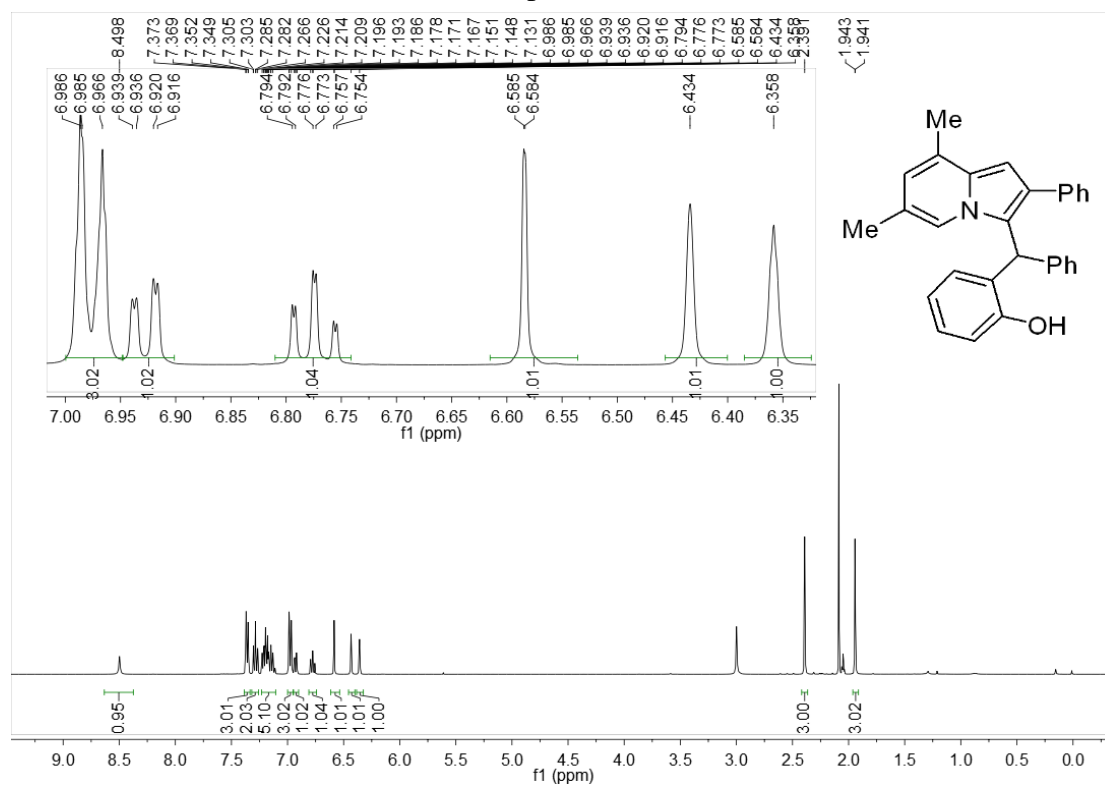

$^{13}\text{C}$  NMR (100 MHz,  $\text{CDCl}_3$ ) of compound **3ha**

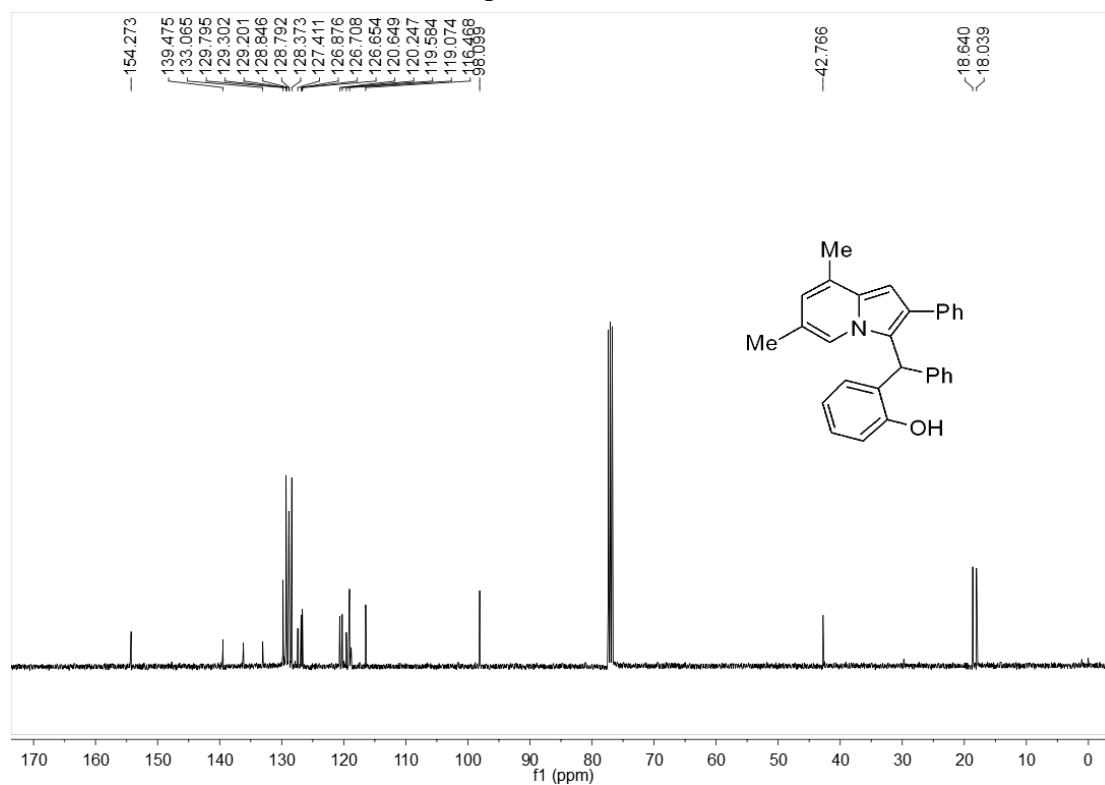

$^1\text{H}$  NMR (400 MHz, *acetone-d*<sub>6</sub>) of compound **3ab**

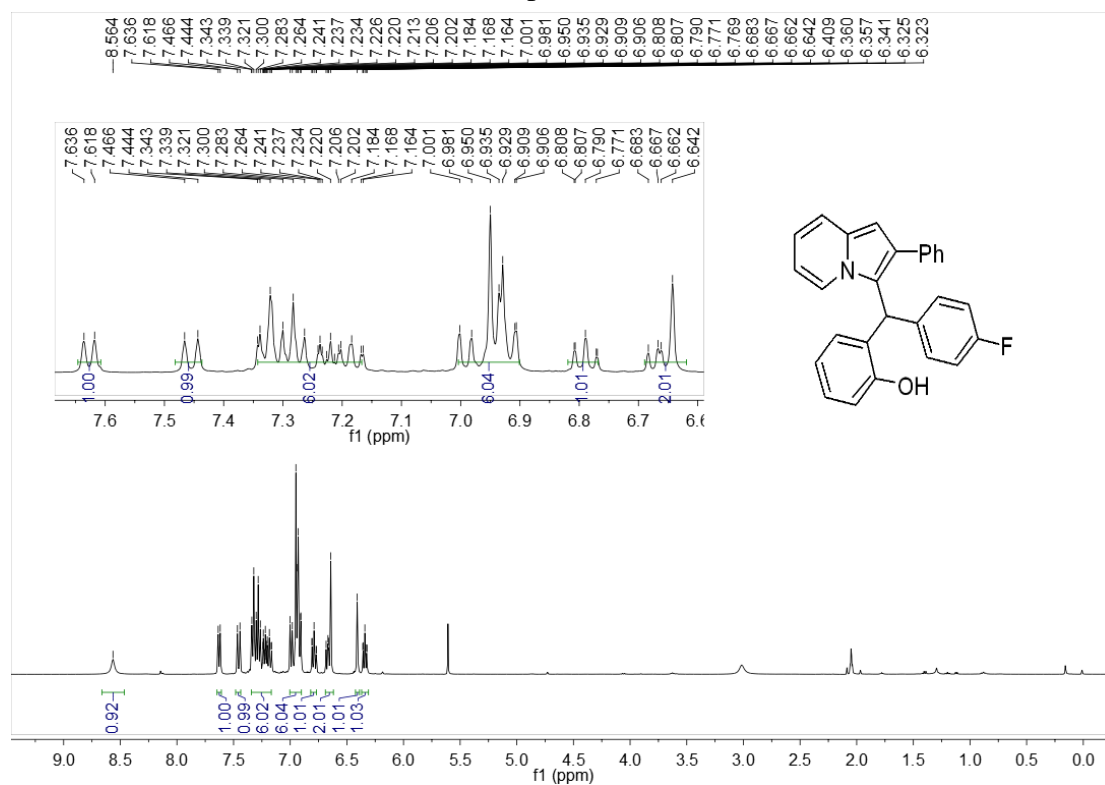

$^{13}\text{C}$  NMR (100 MHz, *acetone-d*<sub>6</sub>) of compound **3ab**

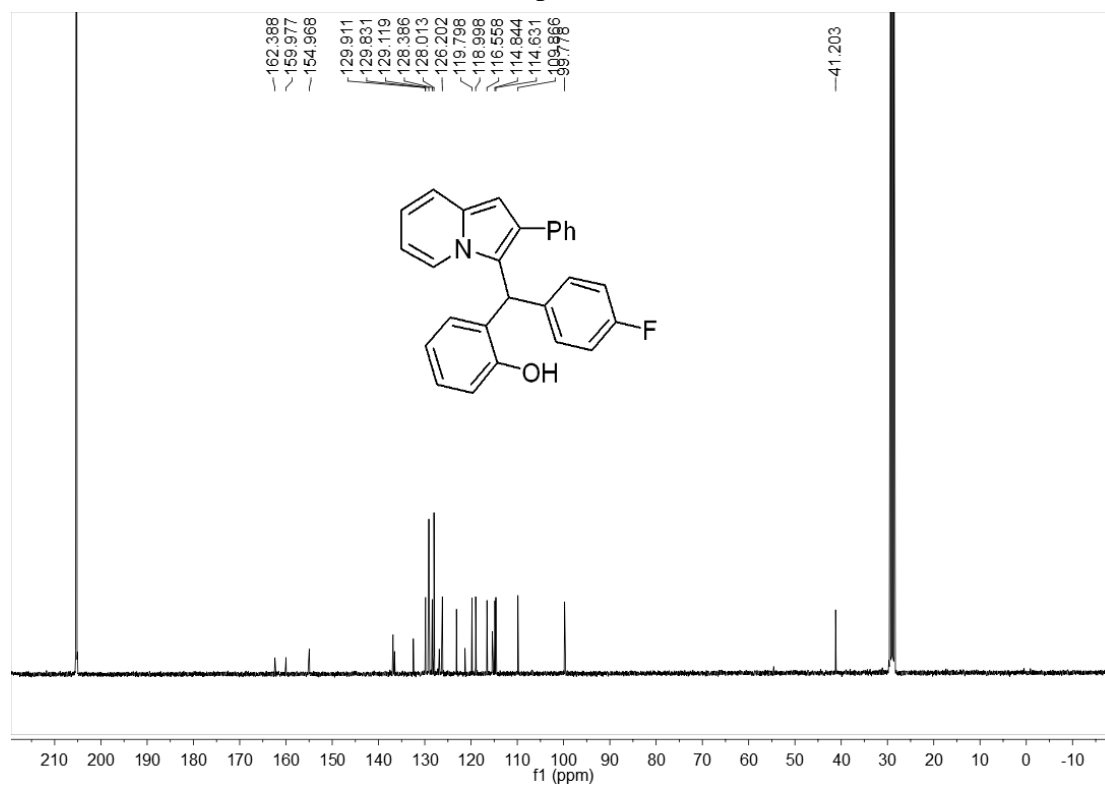

<sup>1</sup>H NMR (400 MHz, *acetone-d*<sub>6</sub>) of compound **3ac**

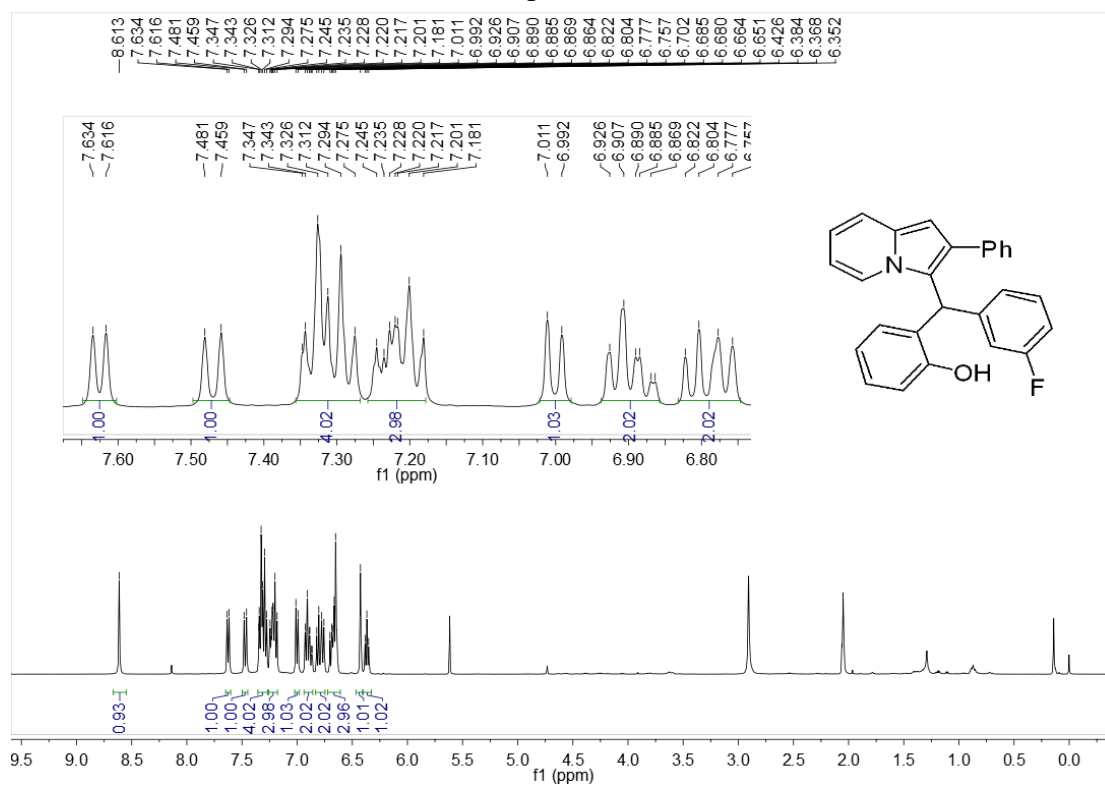

<sup>13</sup>C NMR (100 MHz, *acetone-d*<sub>6</sub>) of compound **3ac**

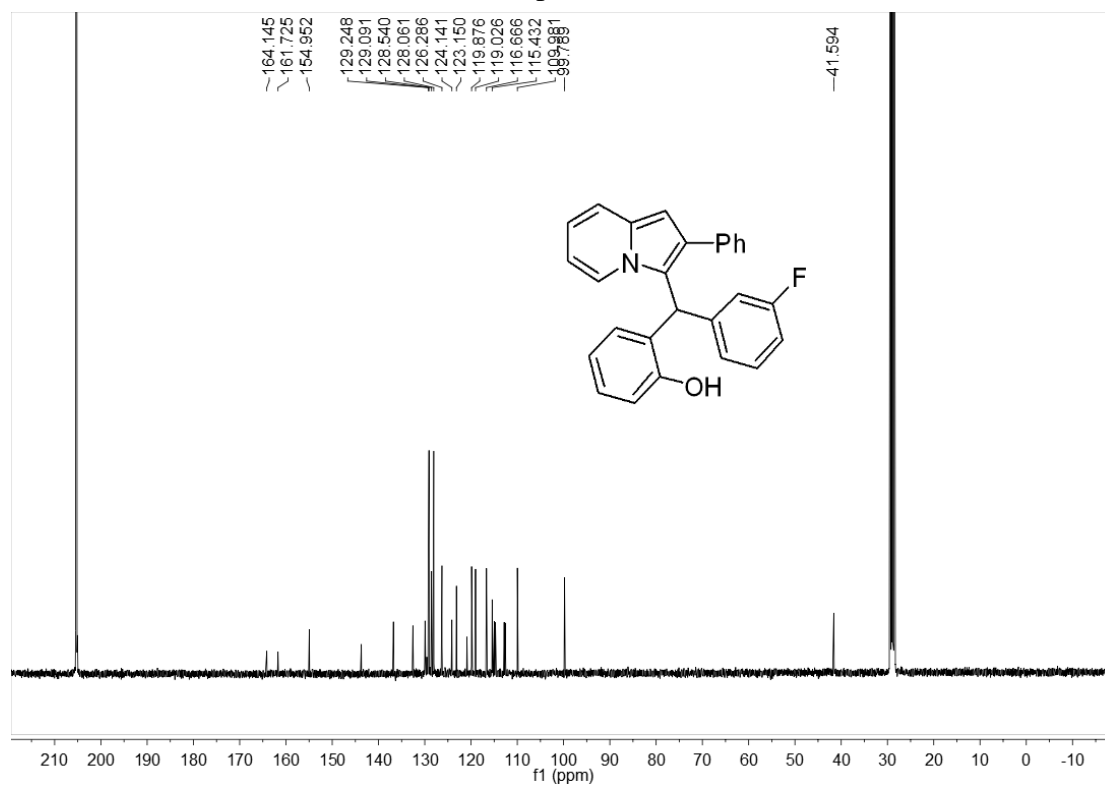

$^1\text{H}$  NMR (400 MHz, *acetone-d*<sub>6</sub>) of compound **3ad**

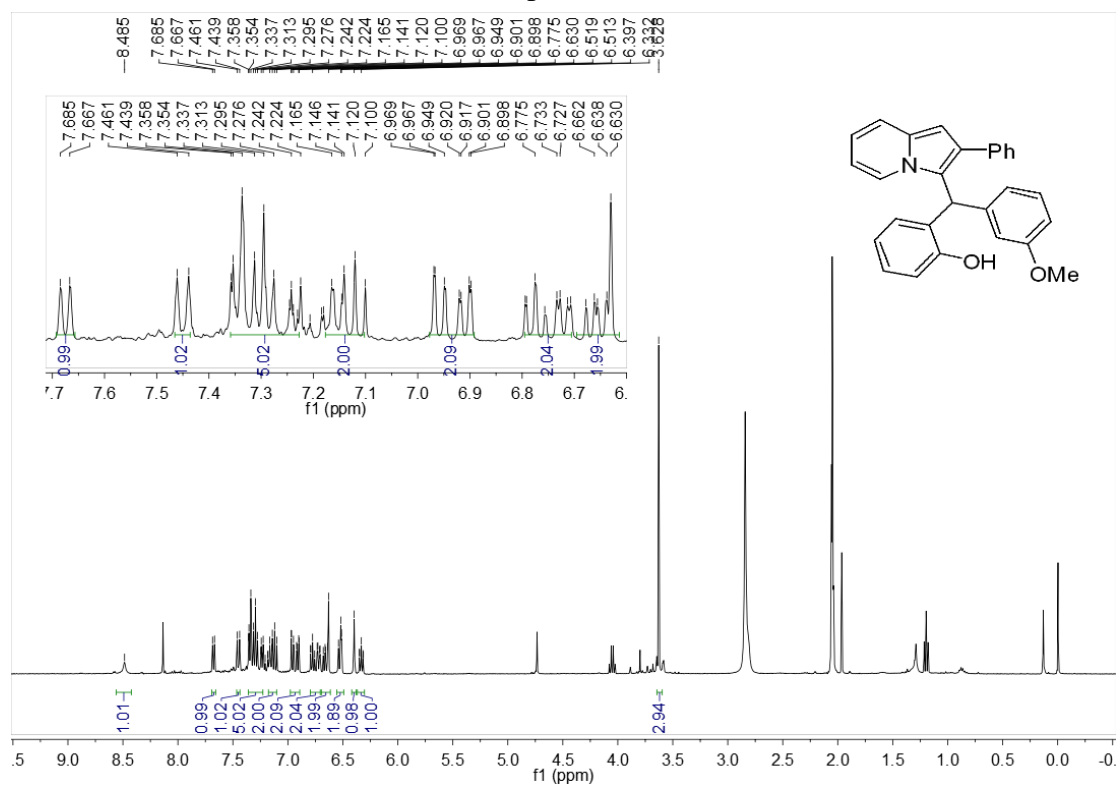

$^{13}\text{C}$  NMR (100 MHz, *acetone-d*<sub>6</sub>) of compound **3ad**

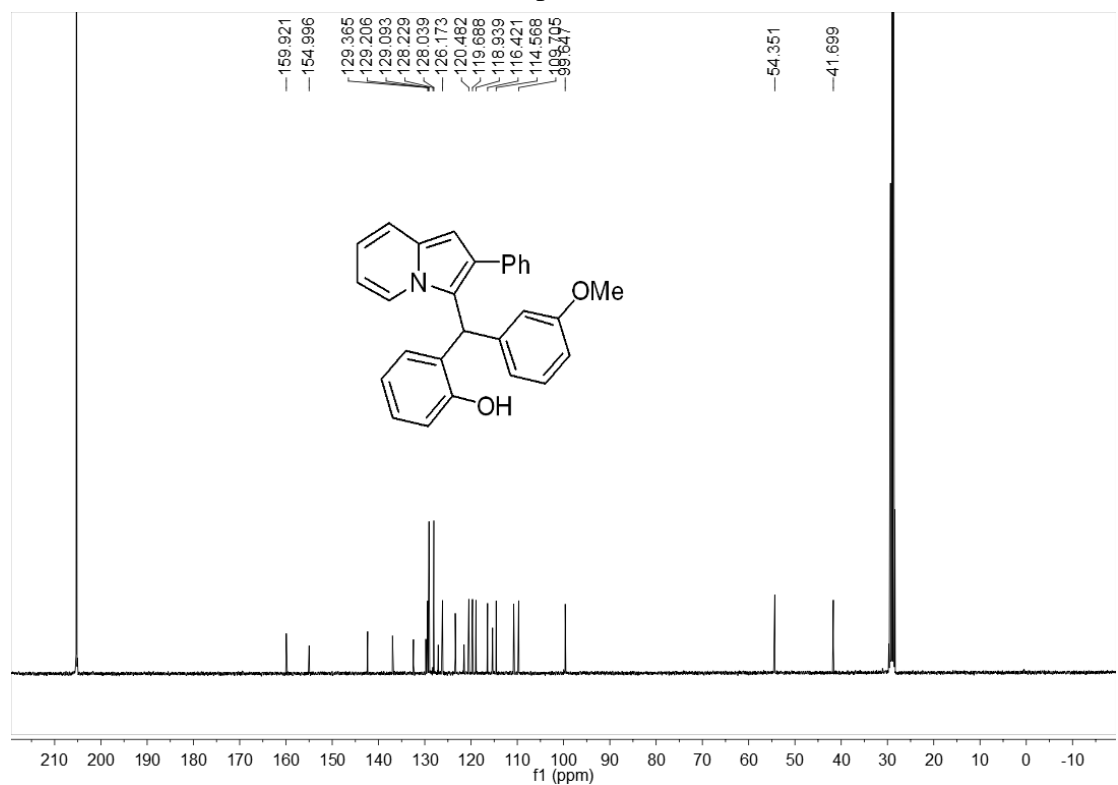

$^1\text{H}$  NMR (400 MHz, *acetone-d*<sub>6</sub>) of compound **3ae**

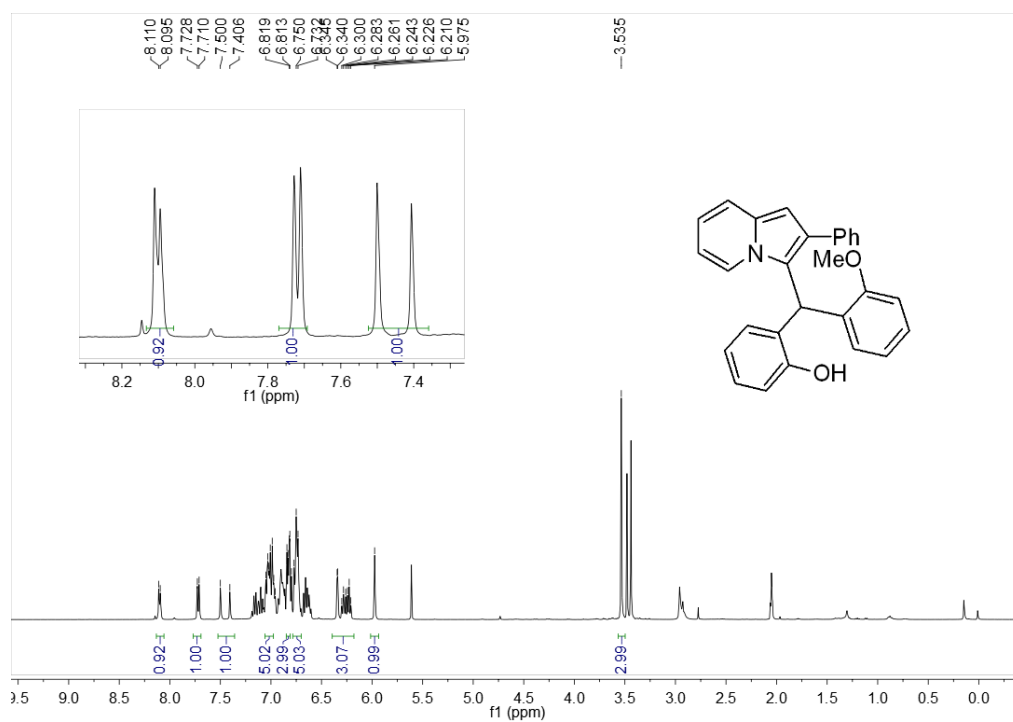

$^{13}\text{C}$  NMR (100 MHz, *acetone-d*<sub>6</sub>) of compound **3ae**

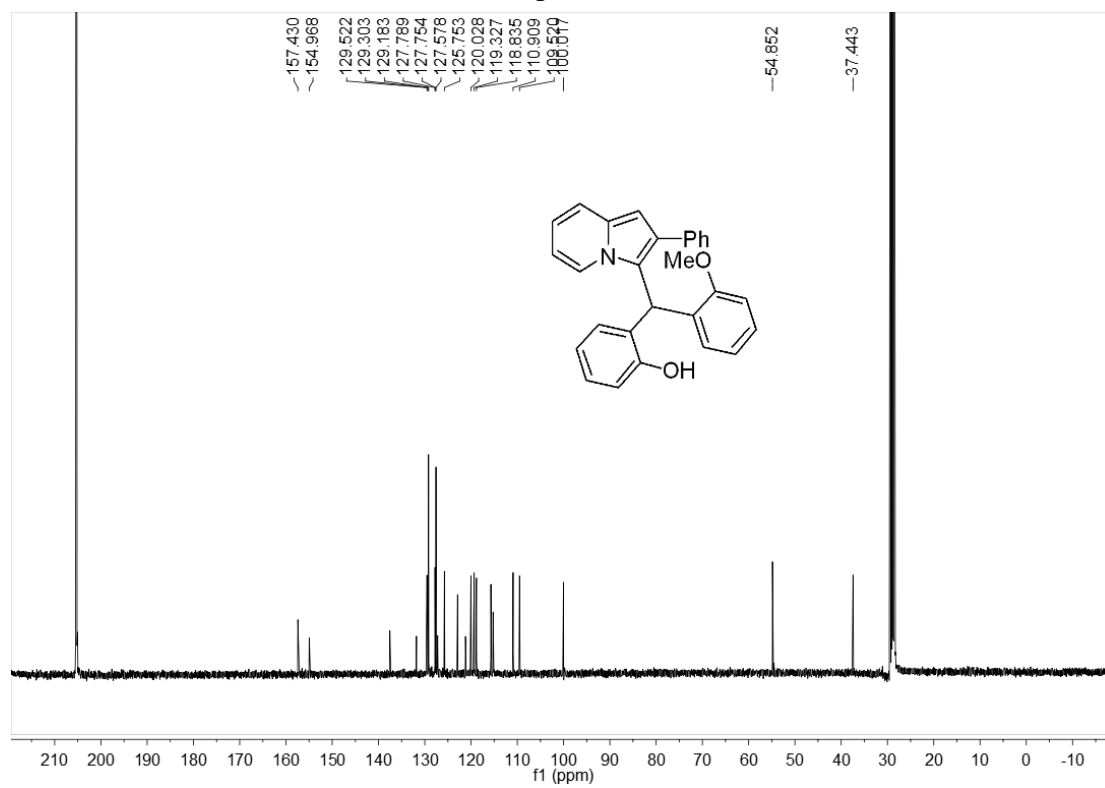

<sup>1</sup>H NMR (400 MHz, *acetone-d*<sub>6</sub>) of compound **3af**

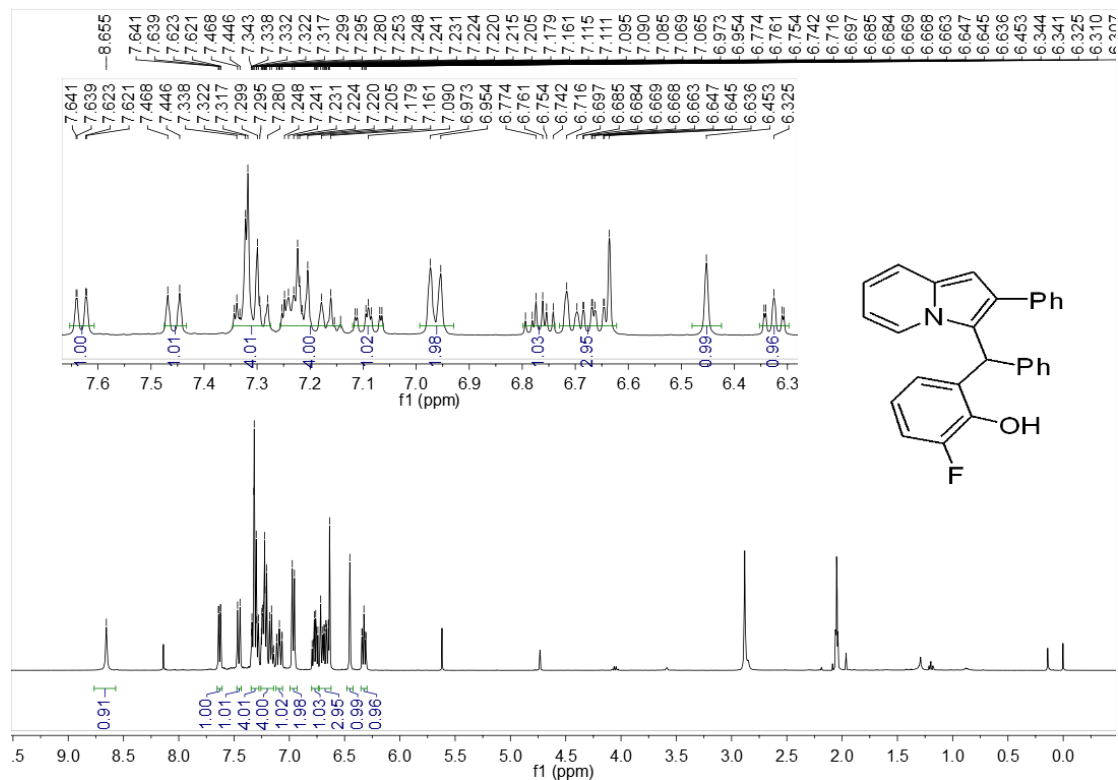

<sup>13</sup>C NMR (100 MHz, *acetone-d*<sub>6</sub>) of compound **3af**

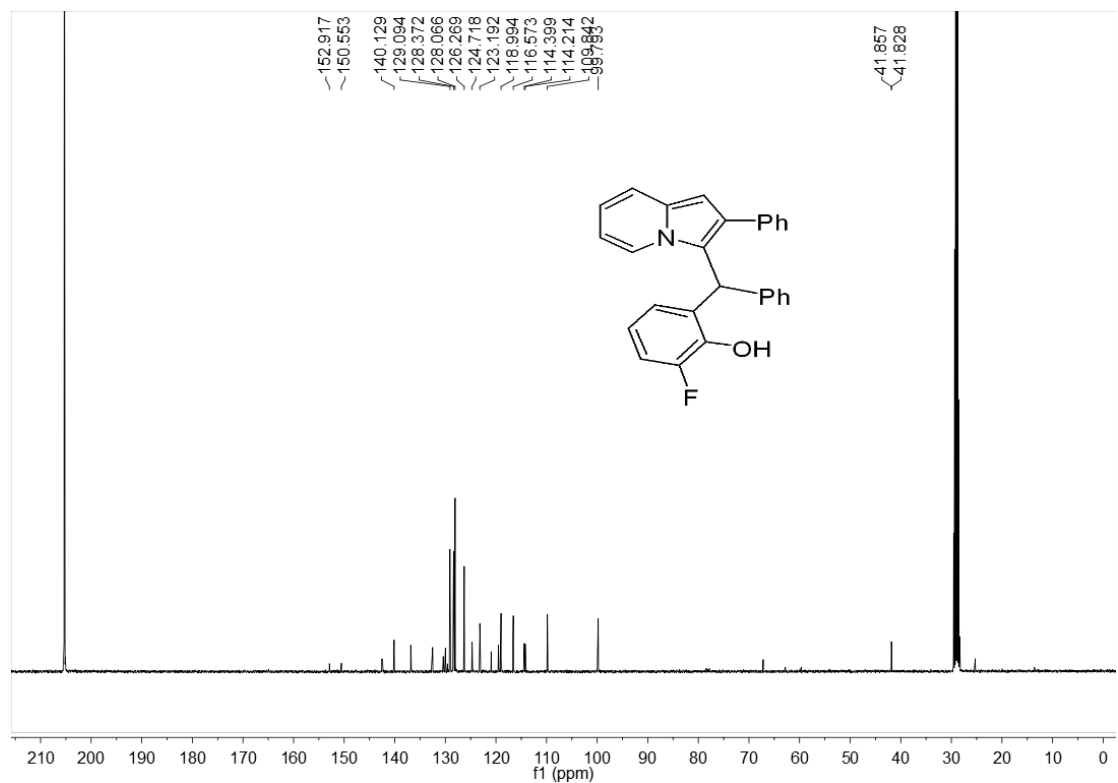

<sup>1</sup>H NMR (400 MHz, acetone-d<sub>6</sub>) of compound **3ag**

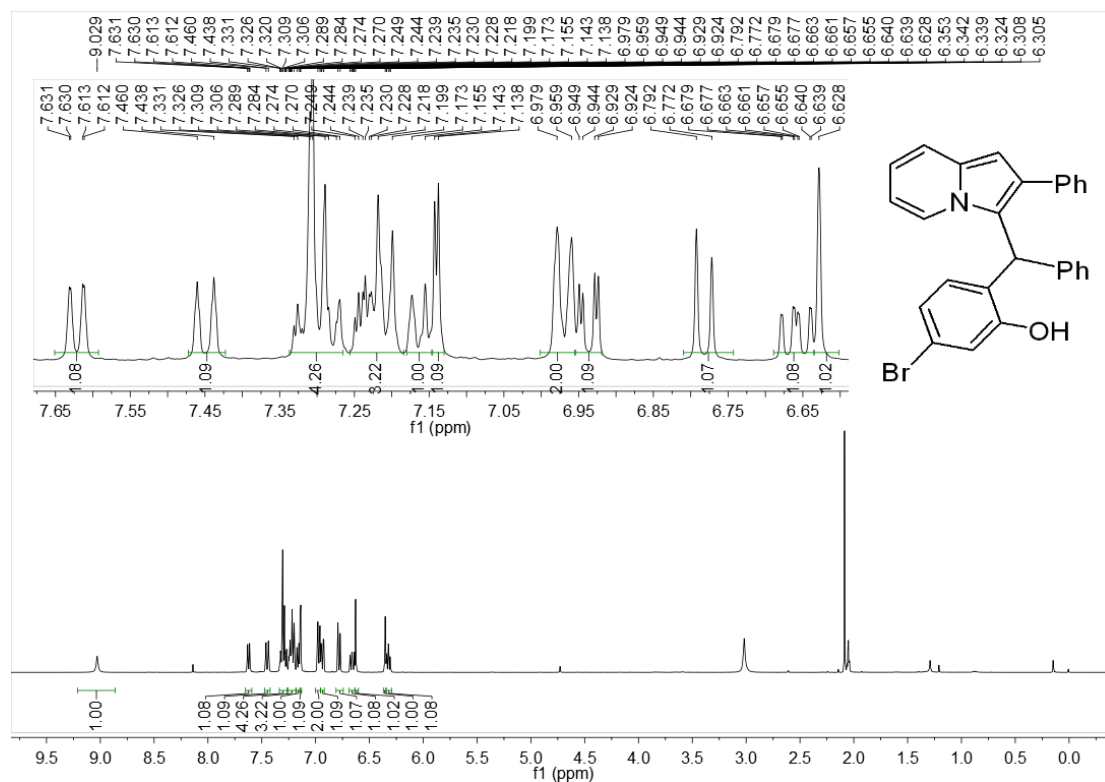

<sup>13</sup>C NMR (100 MHz, acetone-d<sub>6</sub>) of compound **3ag**

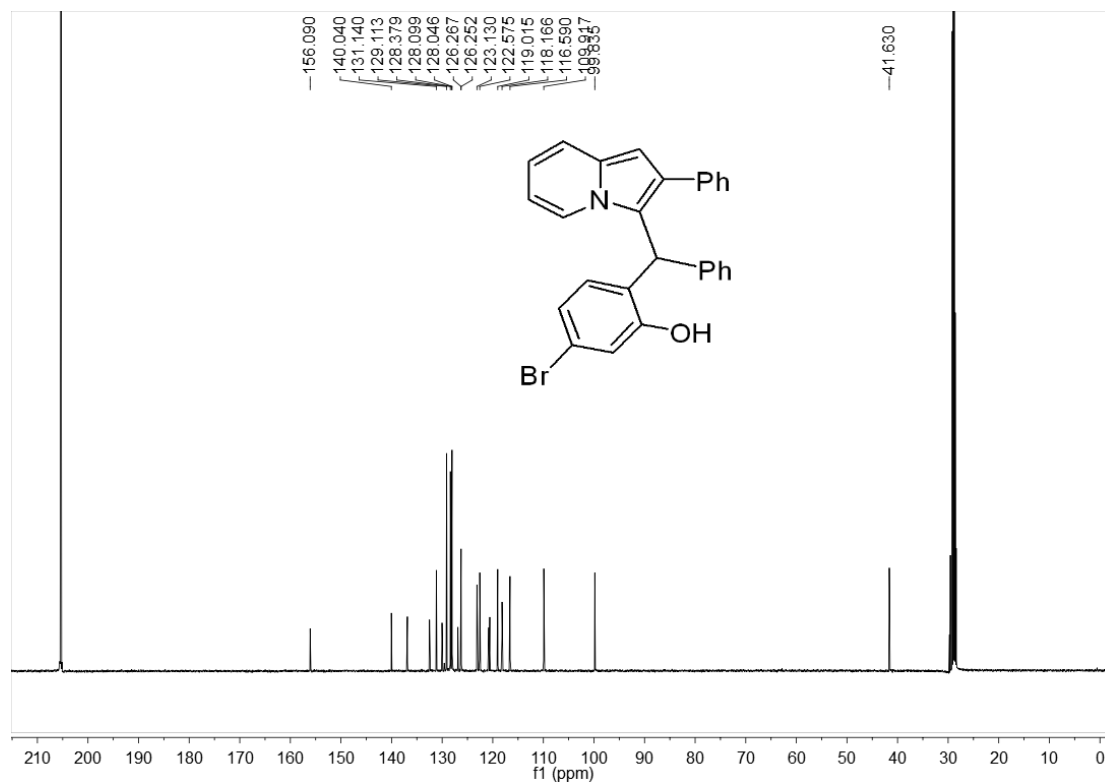

<sup>1</sup>H NMR (400 MHz, acetone-d<sub>6</sub>) of compound **3ah**

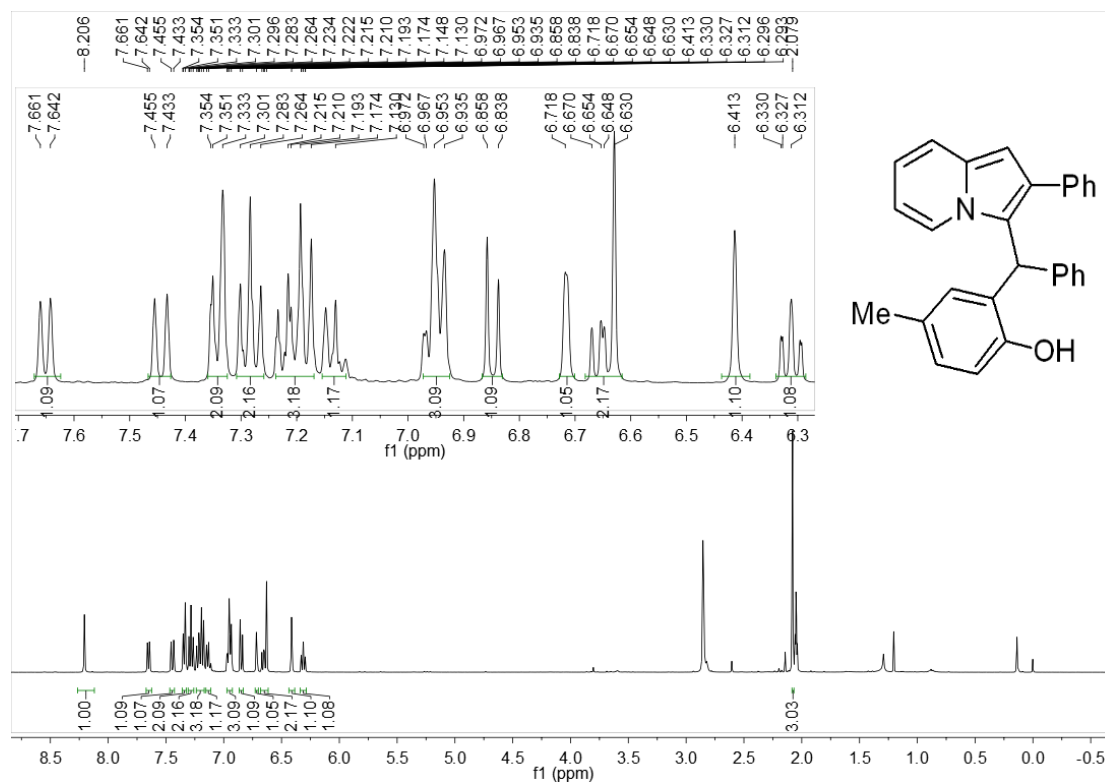

<sup>13</sup>C NMR (100 MHz, acetone-d<sub>6</sub>) of compound **3ah**

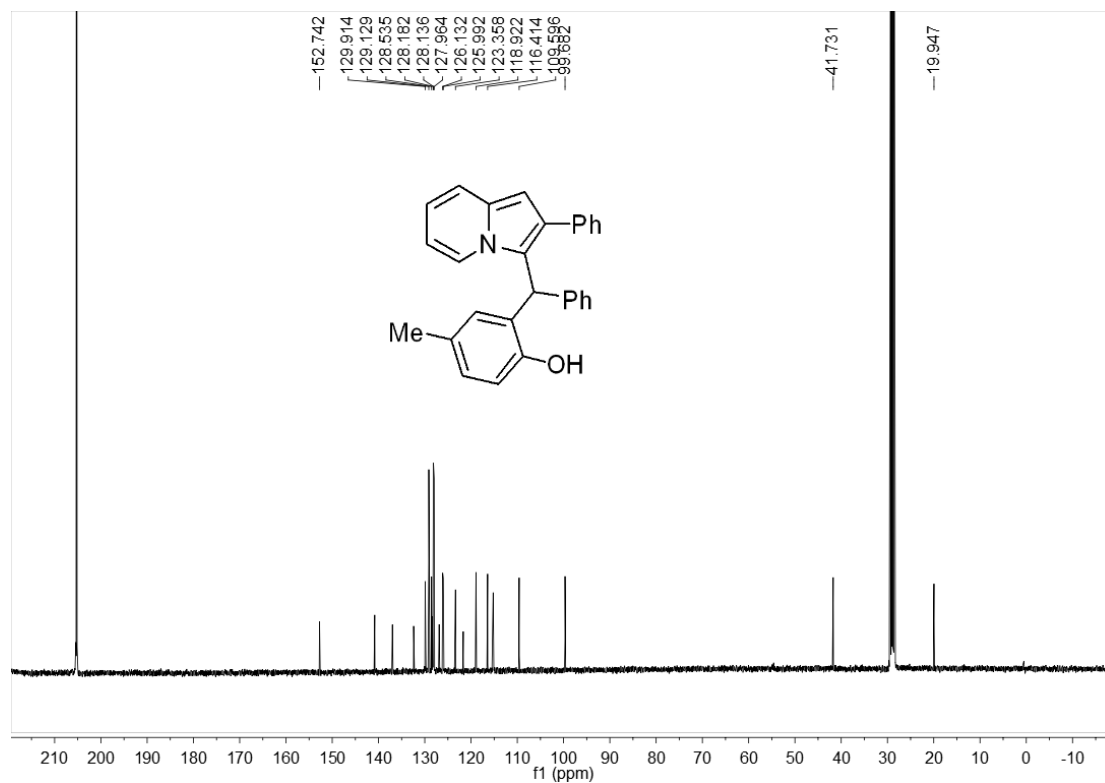



$^1\text{H}$  NMR (400 MHz, *acetone-d*<sub>6</sub>) of compound **5**

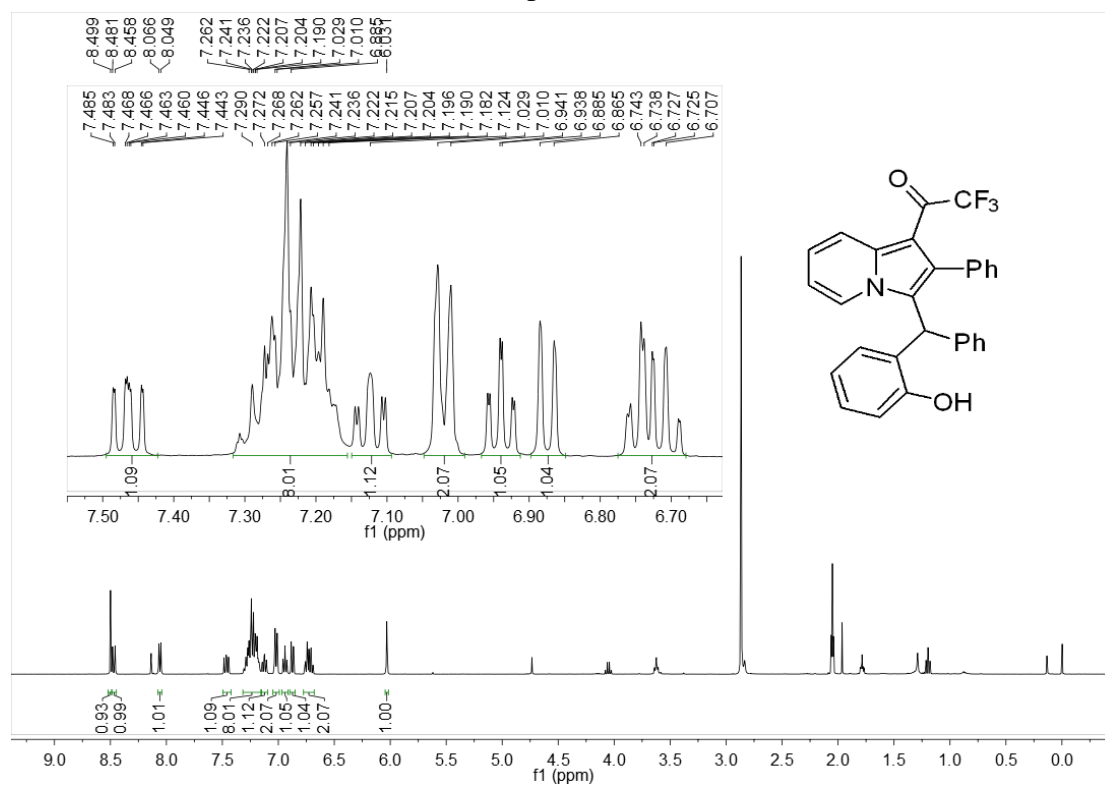

$^{13}\text{C}$  NMR (100 MHz, *acetone-d*<sub>6</sub>) of compound **5**

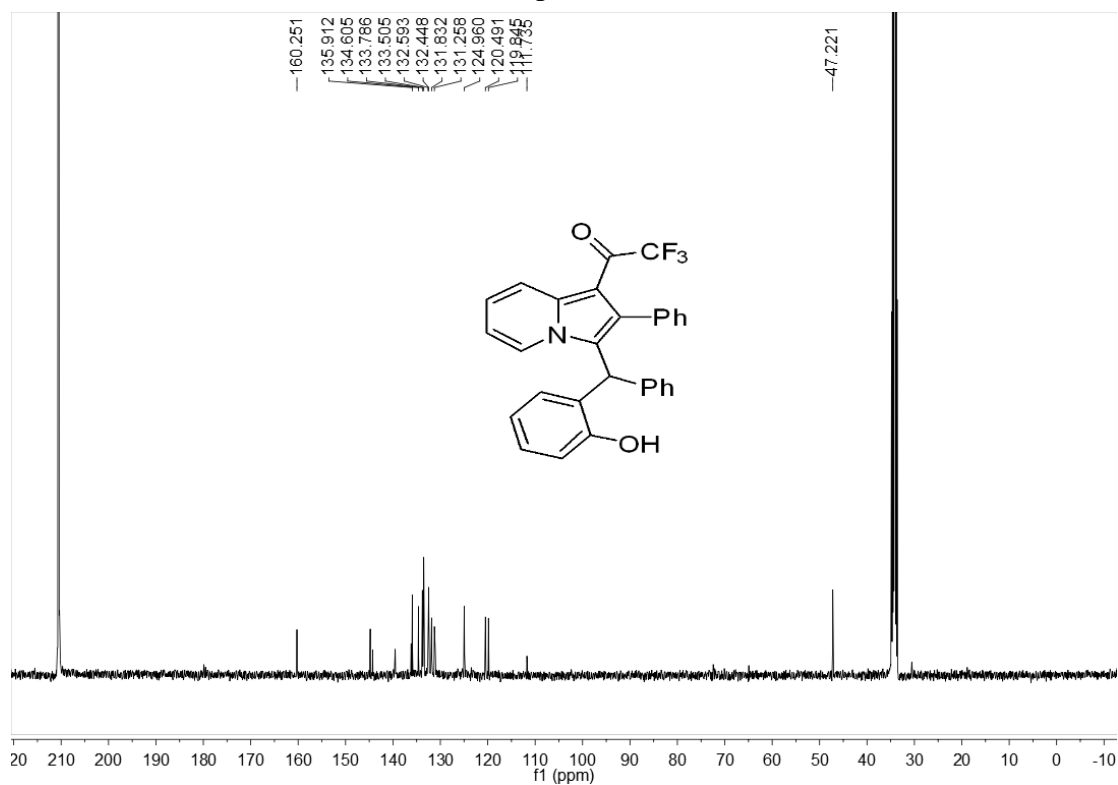

$^1\text{H}$  NMR (400 MHz,  $\text{CDCl}_3$ ) of compound **7**

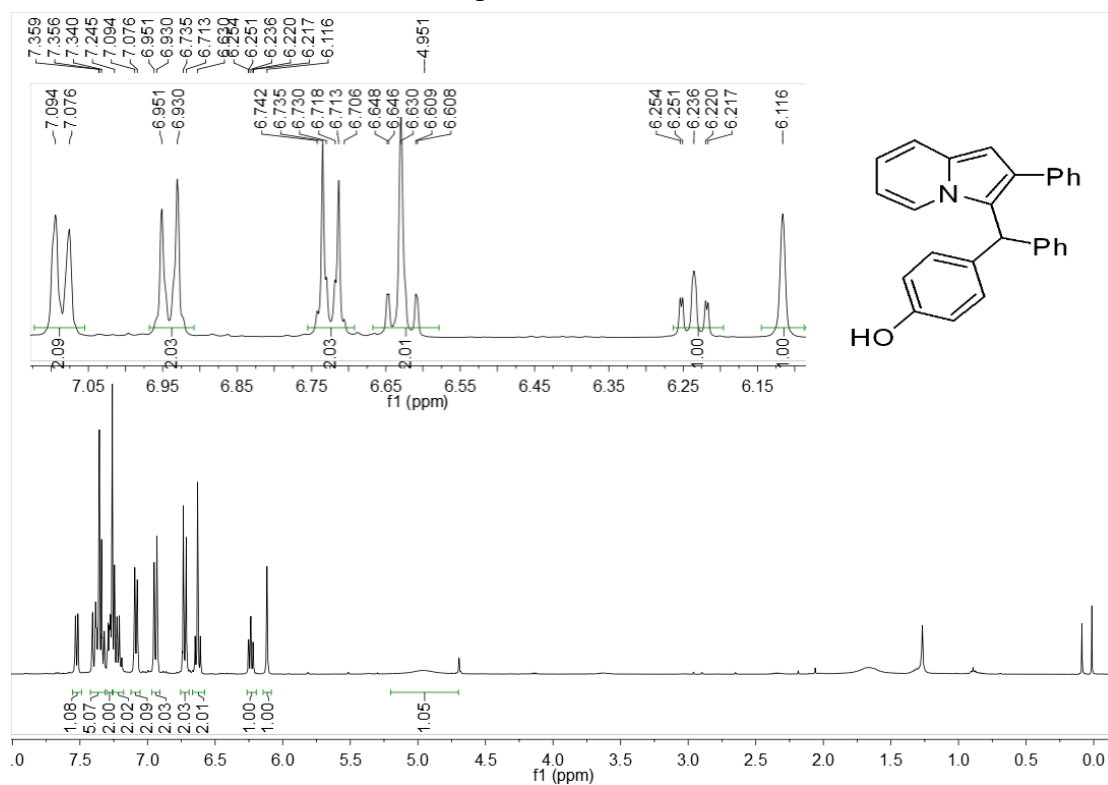

$^{13}\text{C}$  NMR (100 MHz,  $\text{CDCl}_3$ ) of compound **7**

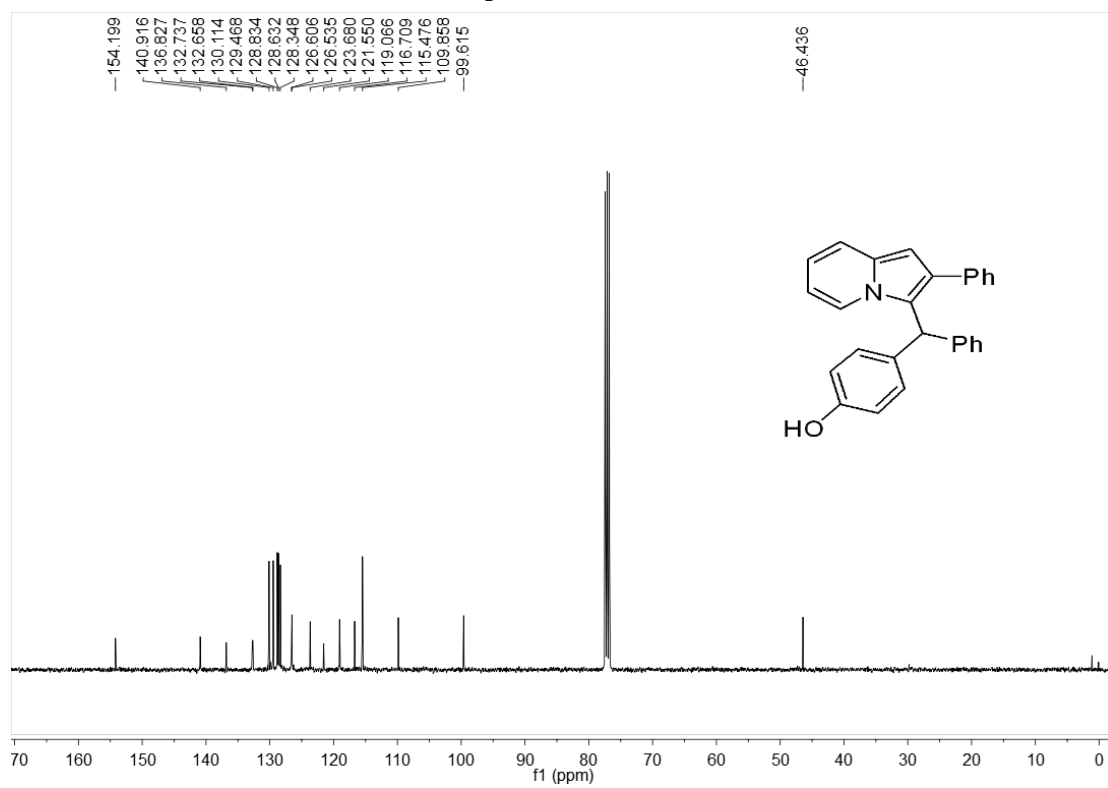

$^1\text{H}$  NMR (400 MHz, *acetone-d*<sub>6</sub>) of compound **9**

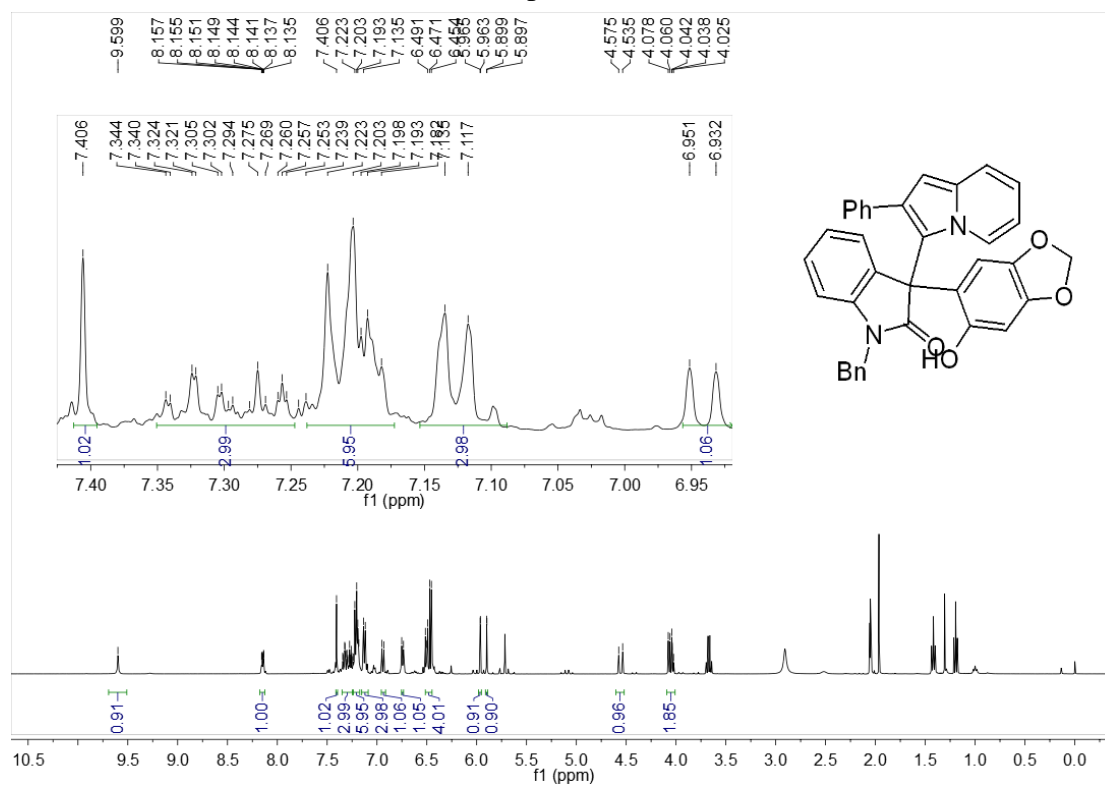

$^{13}\text{C}$  NMR (100 MHz, *acetone-d*<sub>6</sub>) of compound **9**

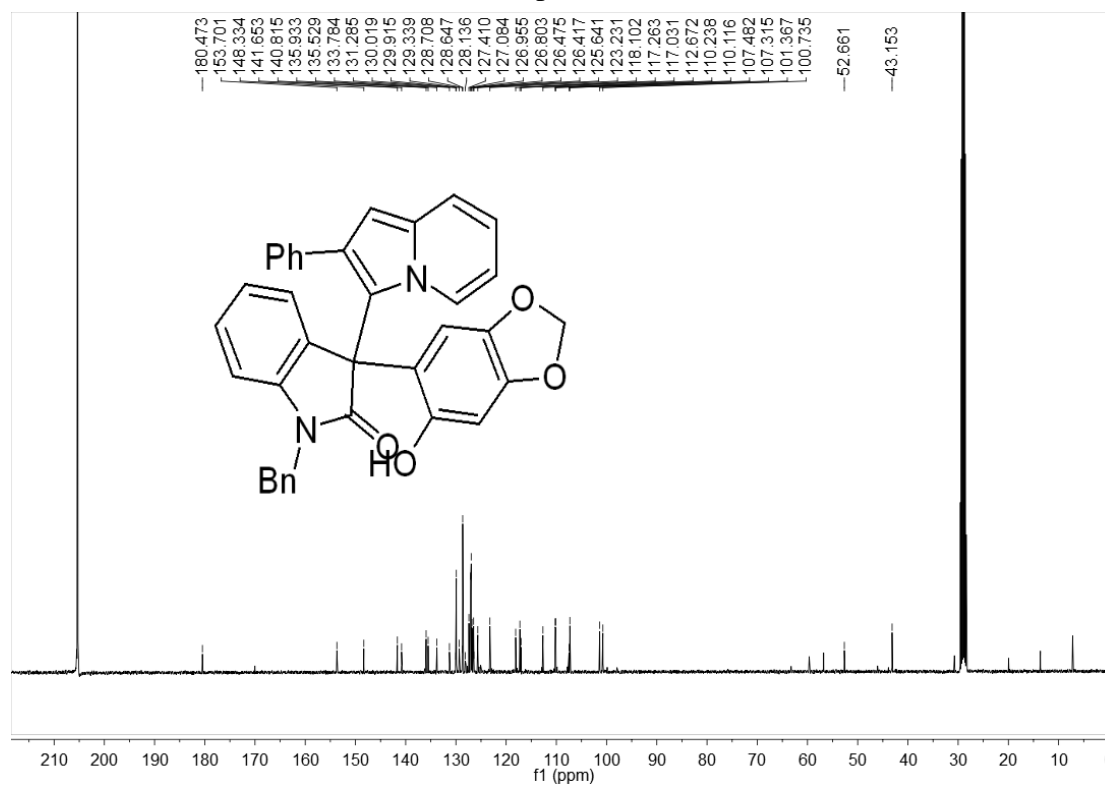

<sup>1</sup>H NMR (400 MHz, *acetone-d*<sub>6</sub>) of compound **11**

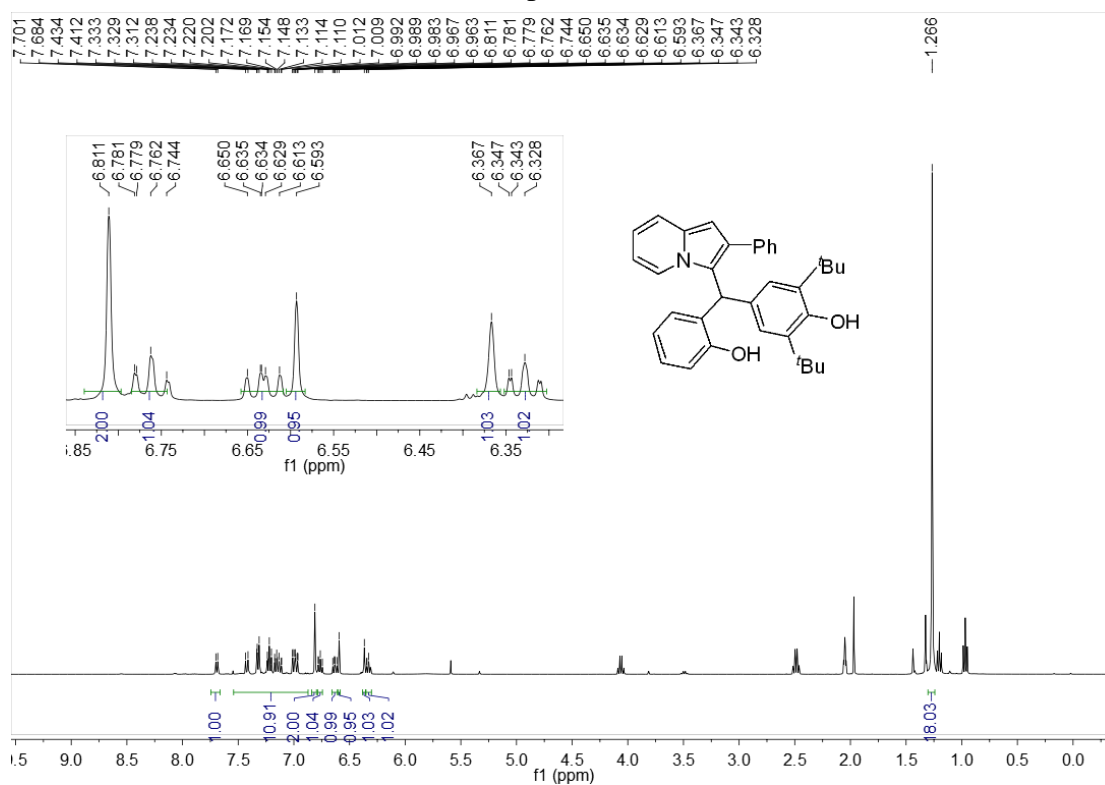

<sup>13</sup>C NMR (100 MHz, *acetone-d*<sub>6</sub>) of compound **11**

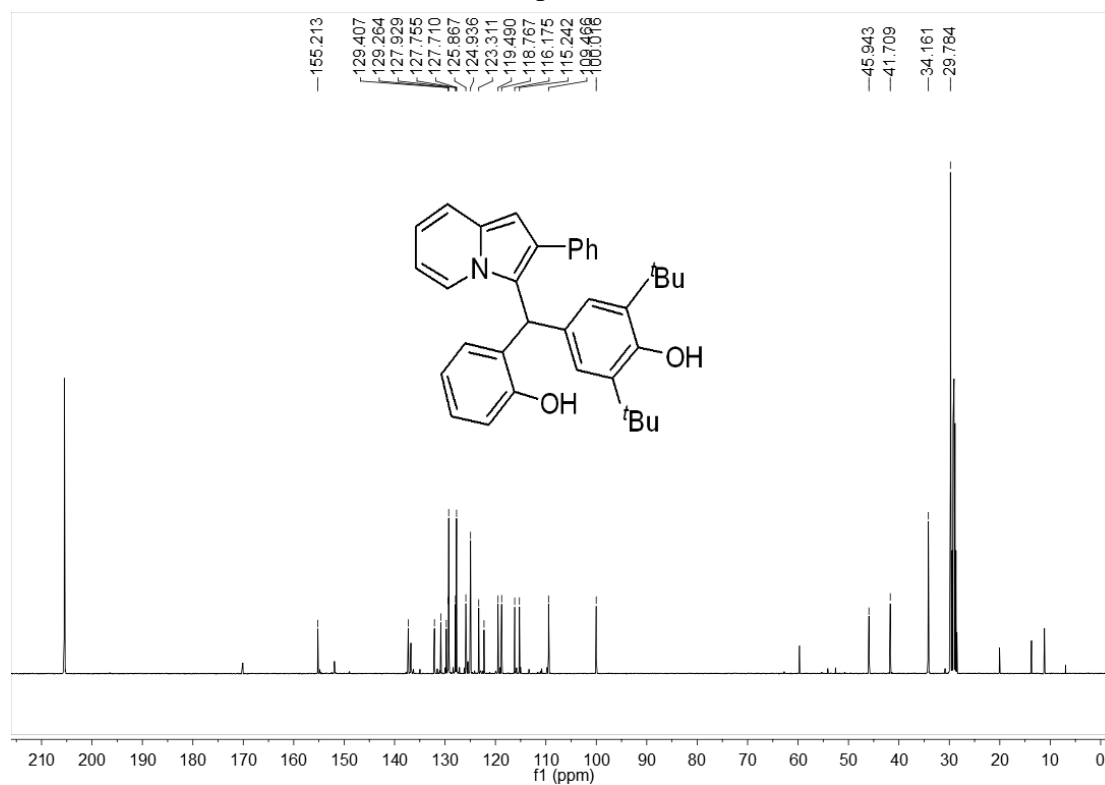

$^1\text{H}$  NMR (400 MHz, *acetone-d*<sub>6</sub>) of compound **13**

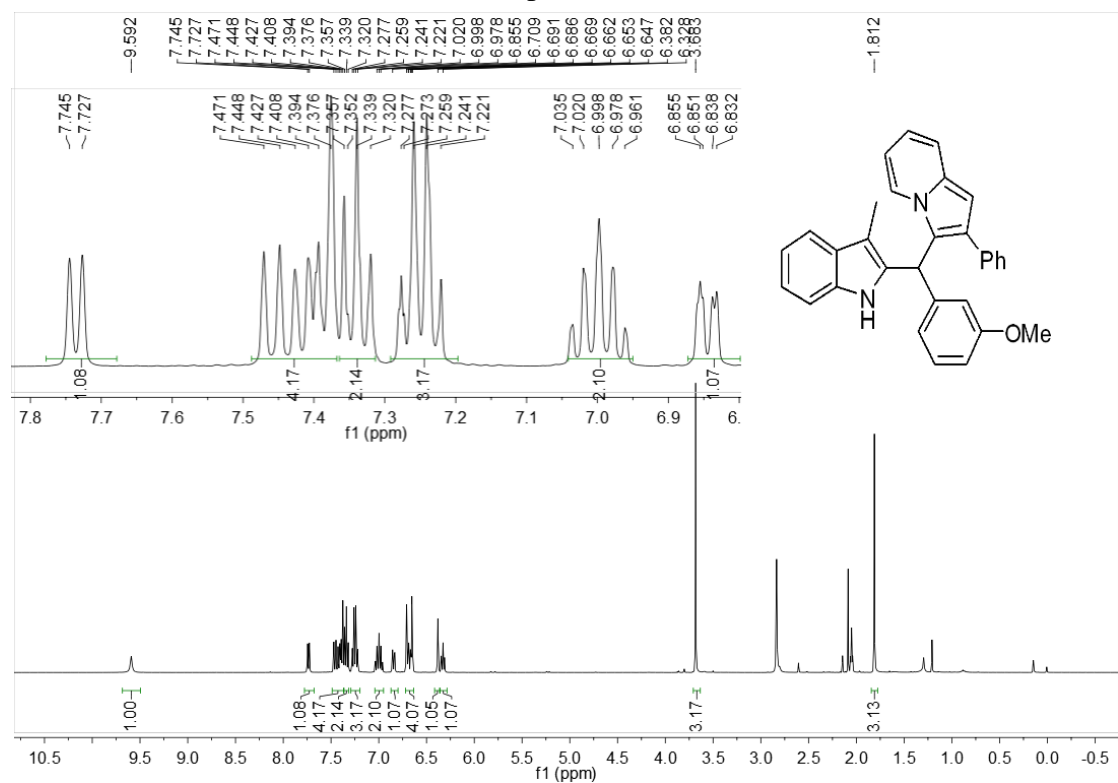

$^{13}\text{C}$  NMR (100 MHz, *acetone-d*<sub>6</sub>) of compound **13**

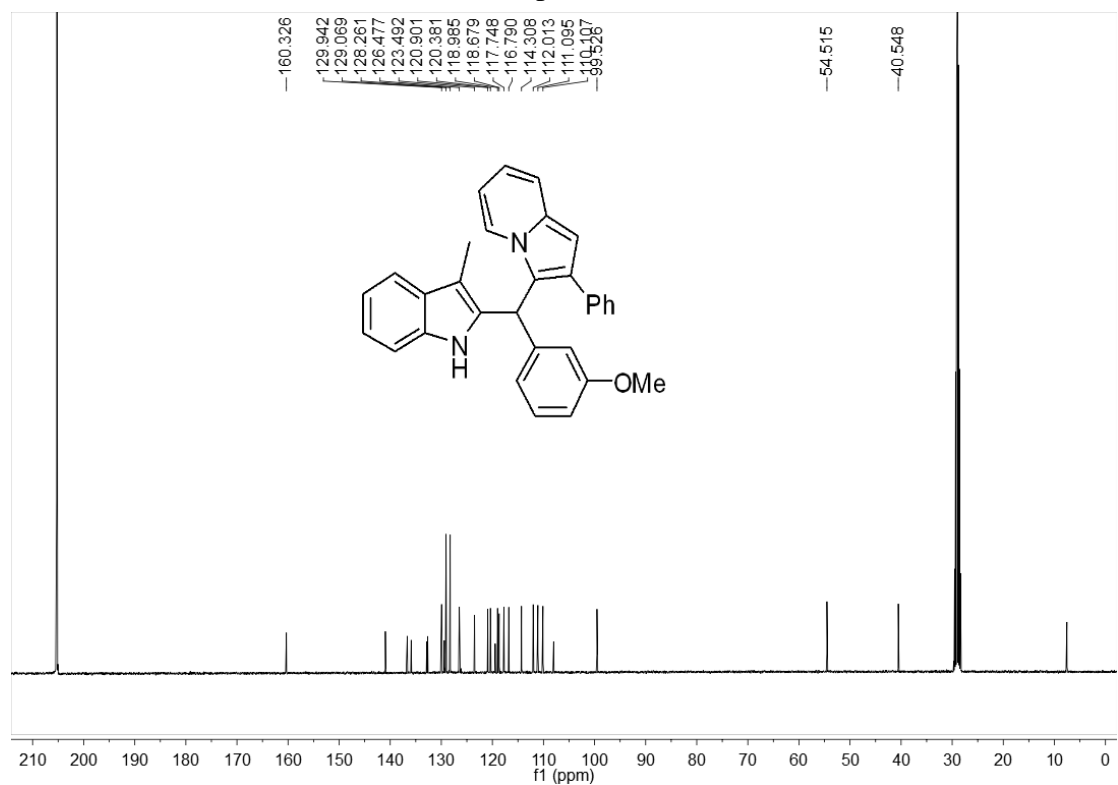

## 2. X-ray single crystal data for compound 5

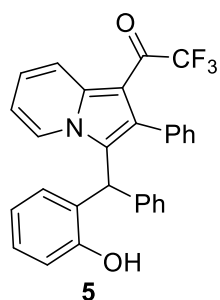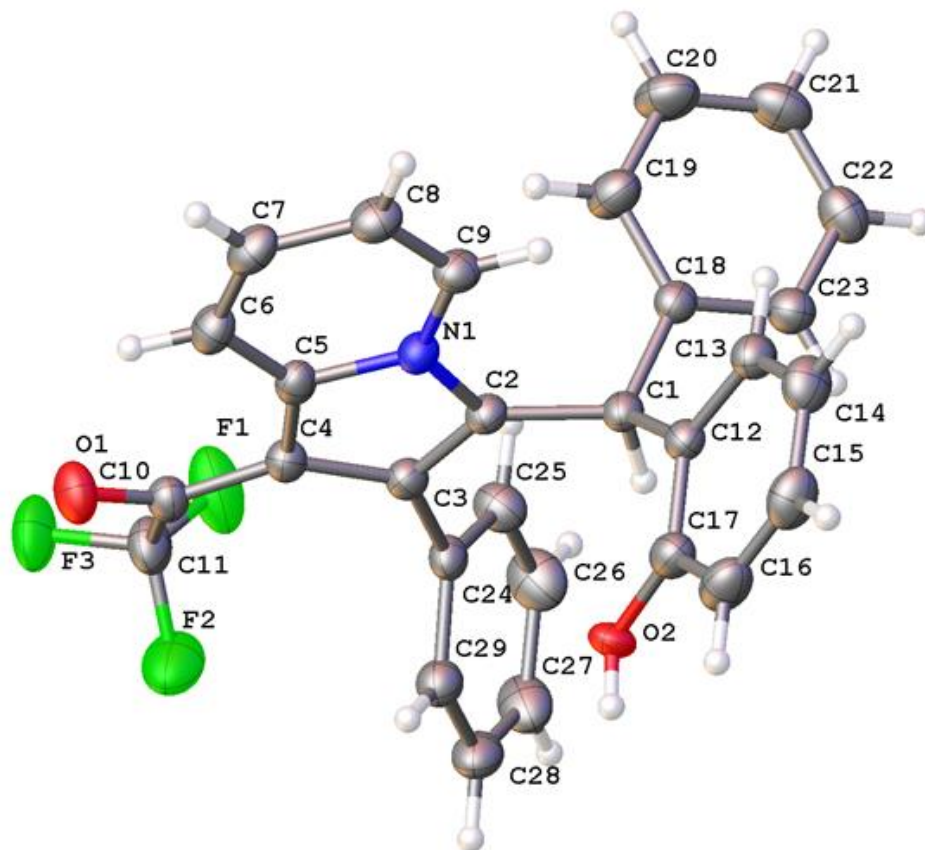

The thermal ellipsoid was drawn at the 30% probability level.

|                      |                                                                 |                 |
|----------------------|-----------------------------------------------------------------|-----------------|
| Identification code  | sf20190530a_0m                                                  |                 |
| Empirical formula    | C <sub>29</sub> H <sub>20</sub> F <sub>3</sub> N O <sub>2</sub> |                 |
| Formula weight       | 471.46                                                          |                 |
| Temperature          | 296.15 K                                                        |                 |
| Wavelength           | 0.71073 Å                                                       |                 |
| Crystal system       | Triclinic                                                       |                 |
| Space group          | P-1                                                             |                 |
| Unit cell dimensions | a = 10.333(4) Å                                                 | α = 88.838(5) ° |
|                      | b = 10.460(4) Å                                                 | β = 68.455(5) ° |
|                      | c = 11.583(5) Å                                                 | γ = 79.684(6) ° |

|                                   |                                             |
|-----------------------------------|---------------------------------------------|
| Volume                            | 1144.2(8) Å <sup>3</sup>                    |
| Z                                 | 2                                           |
| Density (calculated)              | 1.368 Mg/m <sup>3</sup>                     |
| Absorption coefficient            | 0.102 mm <sup>-1</sup>                      |
| F(000)                            | 488                                         |
| Theta range for data collection   | 2.672 to 25.678 °                           |
| Index ranges                      | -12<=h<=9, -12<=k<=12, -14<=l<=13           |
| Reflections collected             | 6041                                        |
| Independent reflections           | 4240 [R(int) = 0.0168]                      |
| Completeness to theta = 25.242 °  | 98.0 %                                      |
| Absorption correction             | Semi-empirical from equivalents             |
| Max. and min. transmission        | 0.7455 and 0.6815                           |
| Refinement method                 | Full-matrix least-squares on F <sup>2</sup> |
| Data / restraints / parameters    | 4240 / 0 / 327                              |
| Goodness-of-fit on F <sup>2</sup> | 1.034                                       |
| Final R indices [I>2sigma(I)]     | R1 = 0.0555, wR2 = 0.1420                   |
| R indices (all data)              | R1 = 0.0887, wR2 = 0.1617                   |
| Extinction coefficient            | n/a                                         |
| Largest diff. peak and hole       | 0.193 and -0.280 e.Å <sup>-3</sup>          |

### 3. HPLC copies of 3aa

Racemic:

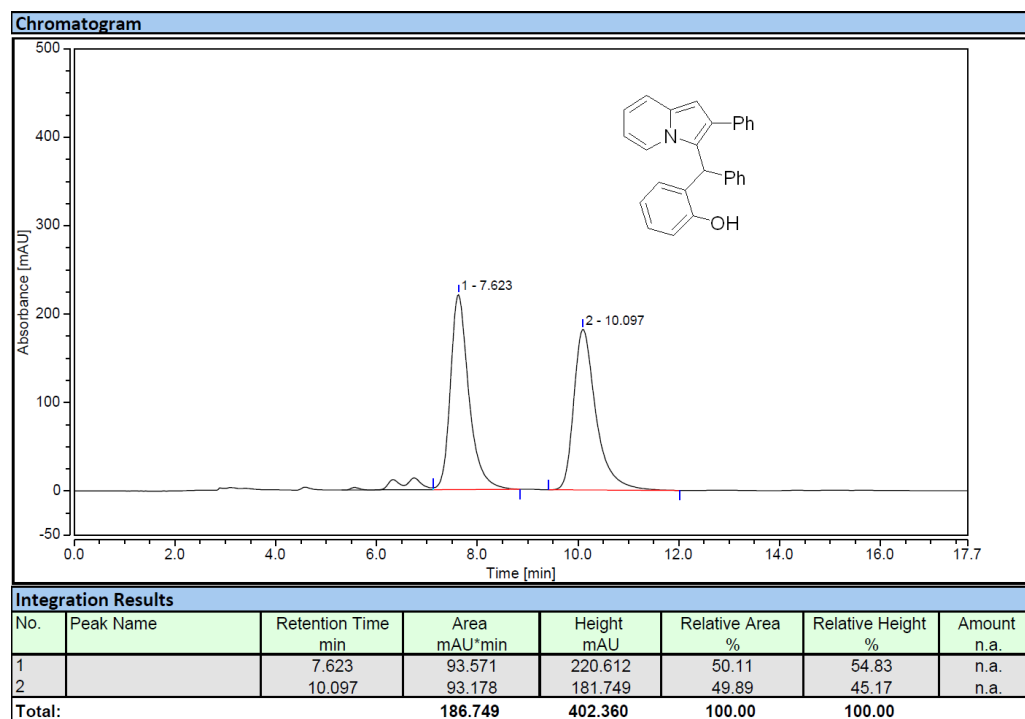

Enantioselective:

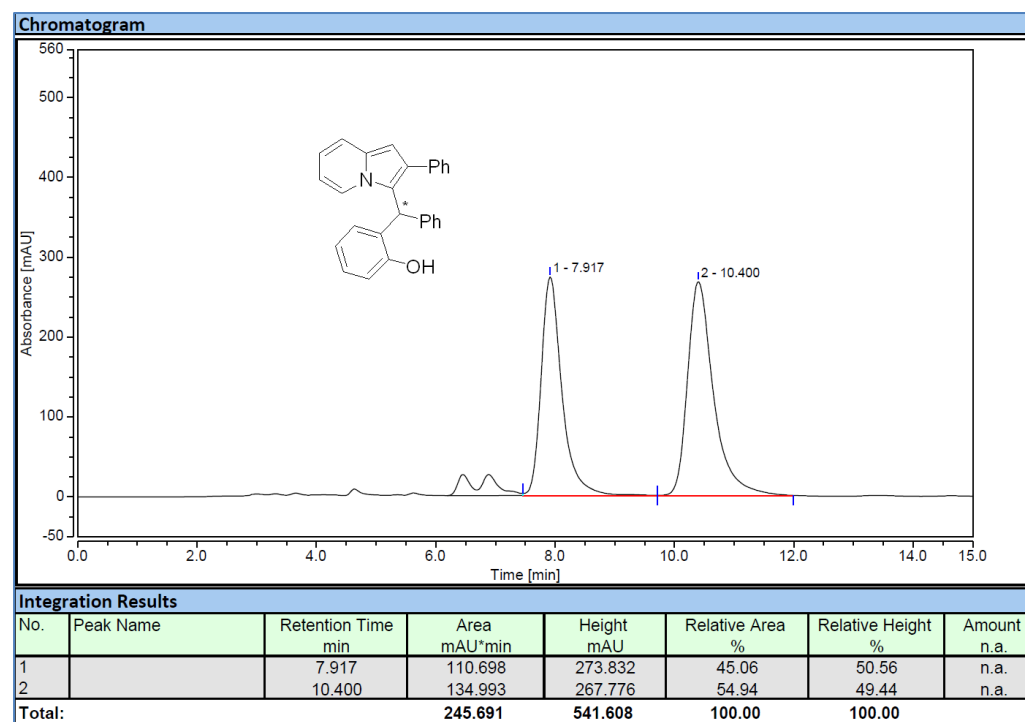

The enantiomeric excess: 10%, determined by HPLC (Daicel Chiralpak IA, hexane/2-propanol = 90/ 10, flow rate 1.0 mL/min, T = 30 °C, 254 nm):  $t_R = 7.917$  (minor),  $t_R = 10.400$  (major).
